1

1 **A chromosome-level genome assembly for the Eastern Fence Lizard (*Sceloporus***  
2 ***undulatus*), a reptile model for physiological and evolutionary ecology**

3 Aundrea K. Westfall<sup>1</sup>, Rory S. Telemeco<sup>1,2</sup>, Mariana B. Grizante<sup>3</sup>, Damien S. Waits<sup>1</sup>, Amanda D.  
4 Clark<sup>1</sup>, Dasia Y. Simpson<sup>1</sup>, Randy L. Klabacka<sup>1</sup>, Alexis P. Sullivan<sup>4</sup>, George H. Perry<sup>4,5,6</sup>,  
5 Michael W. Sears<sup>7</sup>, Christian L. Cox<sup>8,9</sup>, Robert M. Cox<sup>10</sup>, Matthew E. Gifford<sup>11</sup>, Henry B. John-  
6 Alder<sup>12</sup>, Tracy Langkilde<sup>4</sup>, Michael J. Angilletta Jr.<sup>3</sup>, Adam D. Leache<sup>13,14</sup>,  
7 Marc Tollis<sup>3,15</sup>, Kenro Kusumi<sup>3</sup>, and Tonia S. Schwartz<sup>1, §</sup>

8 <sup>1</sup> Department of Biological Sciences, Auburn University, Auburn, AL 36849

9 <sup>2</sup> Department of Biology, California State University Fresno, Fresno, CA 93740

10 <sup>3</sup> School of Life Sciences, Arizona State University, Tempe, AZ 85287

11 <sup>4</sup> Department of Biology, Pennsylvania State University, University Park, PA 16802

12 <sup>5</sup> Department of Anthropology, Pennsylvania State University, University Park, PA 16802

13 <sup>6</sup> Huck Institutes of the Life Sciences, Pennsylvania State University, University Park, PA  
14 16802

15 <sup>7</sup> Department of Biological Sciences, Clemson University, Clemson, SC 29634

16 <sup>8</sup> Department of Biology, Georgia Southern University, Statesboro, GA 30460

17 <sup>9</sup> Department of Biological Sciences, Florida International University, Miami, FL 33199

18 <sup>10</sup> Department of Biology, University of Virginia, Charlottesville, VA 22904

19 <sup>11</sup> Department of Biology, University of Central Arkansas, Conway, AR 72035

20 <sup>12</sup> Department of Ecology, Evolution, and Natural Resources, Rutgers University, New  
21 Brunswick, NJ 08901

22 <sup>13</sup> Department of Biology, University of Washington, Seattle, WA 98195

23 <sup>14</sup> Burke Museum of Natural History and Culture, University of Washington, Seattle, WA  
24 98195

25 <sup>15</sup> School of Informatics, Computing, and Cyber Systems, Northern Arizona University,  
26 Flagstaff, AZ 86011

27 **§Author for Correspondence:** Tonia S. Schwartz, Department of Biological Sciences, Auburn  
28 University, Auburn, AL 36849. *Email:* [tschwartz@auburn.edu](mailto:tschwartz@auburn.edu) *phone:* 334-844-1555

29 Running Head: Eastern Fence Lizard Genome

30 Word Count: 5291

## 31 **Abstract**

32 High-quality genomic resources facilitate population-level and species-level comparisons  
33 to answer questions about behavioral ecology, morphological and physiological  
34 adaptations, as well as the evolution of genomic architecture. Squamate reptiles (lizards  
35 and snakes) are particularly diverse in characteristics that have intrigued evolutionary  
36 biologists, but high-quality genomic resources for squamates are relatively sparse. Lizards  
37 in the genus *Sceloporus* have a long history as important ecological, evolutionary, and  
38 physiological models, making them a valuable target for the development of genomic  
39 resources. We present a high-quality chromosome-level reference genome assembly,  
40 SceUnd1.0, (utilizing 10X Genomics Chromium, HiC, and PacBio data) and  
41 tissue/developmental stage transcriptomes for the Eastern Fence Lizard, *Sceloporus*  
42 *undulatus*. We performed synteny analysis with other available squamate chromosome-  
43 level assemblies to identify broad patterns of chromosome evolution including the fusion of  
44 micro- and macrochromosomes in *S. undulatus*. Using this new *S. undulatus* genome  
45 assembly we conducted reference-based assemblies for 34 other *Sceloporus* species to  
46 improve draft nuclear genomes assemblies from 1% coverage to 43% coverage on average.  
47 Across these species, typically >90% of reads mapped for species within 20 million years  
48 divergence from *S. undulatus*, this dropped to 75% reads mapped for species at 35 million  
49 years divergence. Finally we use RNAseq and whole genome resequencing data to compare  
50 the three assemblies as references, each representing an increased level of sequencing, cost  
51 and assembly efforts: Supernova Assembly with data from 10X Genomics Chromium  
52 library; HiRise Assembly that added data from HiC library; and PBJelly Assembly that  
53 added data from PacBio sequencing. We found that the Supernova Assembly contained the  
54 full genome and was a suitable reference for RNAseq, but the chromosome-level scaffolds  
55 provided by the addition of the HiC data allowed the reference to be used for other whole  
56 genome analysis, including synteny and whole genome association mapping analyses. The  
57 addition of PacBio data provided negligible gains. Overall, these new genomic resources  
58 provide valuable tools for advanced molecular analysis of an organism that has become a  
59 model in physiology and evolutionary ecology.

60 **Keywords:** genome, transcriptome, squamate, reptile

## 61 Context

62 Genomic resources, including high-quality reference genomes and transcriptomes,  
63 facilitate comparisons across populations and species to address questions ranging from  
64 broad-scale chromosome evolution to the genetic basis of key adaptations. Squamate  
65 reptiles, the group encompassing lizards and snakes, have served as important models in  
66 ecological and evolutionary physiology due to their extensive metabolic plasticity [1];  
67 diverse reproductive modes including obligate and facultative parthenogenesis [2];  
68 repeated evolution of placental-like structures [2, 3]; shifts among sex determining  
69 systems, with XY, ZW, and temperature-dependent systems represented often in closely  
70 related lizards species [4, 5]; loss of limbs and elongated body forms [6]; and the ability to  
71 regenerate tissue [7, 8].

72 Despite having evolved greater phylogenetic diversity than mammals and birds, two major  
73 vertebrate groups with extensive genome sampling, genomic resources for squamates  
74 remain scarce and assemblies at the chromosome-level are even more rare [7, 9-13]. While  
75 squamates are known to have a level of karyotypic variability similar to that of mammals  
76 [14], the absence of high-quality genome assemblies has led to their exclusion from many  
77 chromosome-level comparative genome analyses. In comparative studies, non-mammalian  
78 amniotes are often represented only by the chicken, which is divergent from squamate  
79 reptiles by almost 280 million years [15], or the green anole (*Anolis carolinensis*), whose  
80 genome is only 60% assembled into chromosomes and is lacking assembled  
81 microchromosomes [14, 16]. However, recent analyses have identified key differences that  
82 distinguish the evolution of squamate genomes from patterns found in mammals and birds  
83 [17], underscoring the need for additional high-quality genome assemblies for lizards and  
84 snakes. The development of additional squamate genomes within and across lineages will  
85 facilitate investigations of the genetic basis for many behavioral, morphological, and  
86 physiological adaptations in comparisons of organisms from the population up to higher-  
87 order taxonomic ranks.

88 Our goal was to develop a high-quality genomic and transcriptomic resources for the spiny  
89 lizards (*Sceloporus*) to further our ability to address fundamental ecological and  
90 evolutionary questions within this taxon, across reptiles and across vertebrates. The genus  
91 *Sceloporus* includes approximately 100 species extending throughout Central America,  
92 Mexico, and the United States [18]. Researchers have used *Sceloporus* for decades as a  
93 model system in the study of physiology [19, 20], ecology [21, 22], reproductive ecology  
94 [23-25], life history [26-28], and evolution [25, 29-31]. The long history of research on

95 *Sceloporus* species, applicability across multiple fields of biology, and the extensive  
96 diversity of the genus makes this an ideal group to target for genomic resource  
97 development.

98 We focus on the Eastern fence lizard, *Sceloporus undulatus*, which is distributed in forested  
99 habitats east of the Mississippi River [32]. Recently, *S. undulatus* has been the focus of  
100 studies on the development of sexual size dimorphism [33, 34], as well as experiments  
101 testing the effects of invasive species [35-37] and climate change [22, 38-40] on survival  
102 and reproduction as a model to understand better the broader consequences of increasing  
103 anthropogenic disturbance. The development of genomic resources for *S. undulates*,  
104 particularly a high-quality genome assembly, will support its role as a model species for  
105 evolutionary and ecological physiology, and will have immediate benefits for a broad range  
106 of comparative studies in physiology, ecology, and evolution.

107 To this end, we developed a high-quality chromosome-level reference genome assembly  
108 and transcriptomes from multiple tissues for the *S. undulatus*. We apply this genome  
109 reference to datasets on three scales: (1) to address how assembly quality influences  
110 mapping in RNAseq and low coverage whole-genome sequence data; (2) to improve upon  
111 the genomic resources for the *Sceloporus* genus by creating reference-based assembly of  
112 draft genomes for 34 other *Sceloporus* species; and (3) to draw broad comparisons in  
113 chromosome structure and conservation with other recently published squamate  
114 chromosome-level genomes through large-scale synteny analysis.

115

## 116 **Methods and Analyses**

### 117 ***Sequencing and assembly of the Sceloporus undulatus genome***

118 Genome sequence data were generated from two male individuals collected at Solon Dixon  
119 Forestry Education Center, in Andalusia, Alabama (31°09'49"N, 86°42'10"W). The animals  
120 were euthanized and tissues were dissected, snap-frozen in liquid nitrogen, and stored at -  
121 80°C. Procedures were approved by the Pennsylvania State University Institutional Animal  
122 Care and Use Committee (Protocol# 44595-1).

123 We developed three *S. undulatus* genome assemblies using increasingly more data with  
124 correspondingly greater cost: (1) a SuperNova assembly containing data from 10X

125 Genomics Chromium, (2) a HiRise assembly containing the 10X Genomics data with the  
126 addition of Hi-C data, and (3) a PBJelly Assembly containing the 10X Genomics data and Hi-  
127 C data, and the addition of PacBio data. These assemblies are provided as supplemental  
128 files and their summary statistics are provided in Table 1.

129 In the fall of 2016, we sequenced DNA from snap-frozen brain tissue of a single juvenile  
130 male *S. undulatus* using 10X Genomics Chromium Genome Solution Library Preparation  
131 with SuperNova Assembly [41] through HudsonAlpha. The library was sequenced on one  
132 lane of Illumina HiSeqX resulting in 774 million 150 bp paired-end reads that were  
133 assembled using the SuperNova pipeline. We refer to this assembly as the SuperNova  
134 Assembly.

135 In the fall of 2017, we sequenced a second male (Figure 1) from the same population using  
136 a Hi-C library with Illumina sequencing through Dovetail Genomics prepared from blood,  
137 liver, and muscle tissue. The remains from the first individual that was used for the  
138 SuperNova Assembly were insufficient for the Hi-C library preparation, which required 100  
139 mg of tissue. Dovetail Genomics developed two Hi-C libraries that were sequenced on an  
140 Illumina HiSeqX to produce 293 million and 289 million (total 582 million) 150 bp PE  
141 reads. The data from both the Hi-C and the 10X Genomics were used for assembly in the  
142 HiRise software pipeline at Dovetail Genomics. We refer to this as the HiRise Assembly.

143 Finally, also in fall of 2017, DNA extracted from the same adult male individual was used by  
144 Dovetail Genomics to generate 1,415,213 PacBio reads with a mean size of 12,418.8 bp  
145 (range 50-82,539 bp). These PacBio data were used for gap-filling to further improve the  
146 lengths of the scaffolds of the HiRise Assembly using the program PBJelly [42]. We refer to  
147 this final assembly containing all three types of sequencing data as the PBJelly Assembly  
148 and the SceUnd1.0 reference genome assembly.

149 For a visual comparison among the three assemblies and to other squamate genomes, we  
150 graphed the genome contiguity for these three assemblies with other squamate reptile  
151 genomes, building on the graph by Roscito et al. [42]. The Eastern fence lizard, *S.*  
152 *undulatus*, SuperNova Assembly (containing only the 10X Genomics data) is as contiguous  
153 as the bearded dragon genome assembly (Figure 2a). The addition of the HiRise data  
154 brought a large increase in continuity. The HiRise and PBJelly *S. undulatus* Assemblies and  
155 are nearly indistinguishable from each other and are among the most contiguous squamate  
156 genome assemblies to date (Figure 2a).

157 The SceUnd1.0 assembly contains 45,024 scaffolds (>850 bp, without gaps) containing 1.9  
158 Gb of sequence, with N50 of 275 Mb. Importantly, 92.6% (1.765 Gb) of the assembled  
159 sequence is contained within the first 11 scaffolds. Chromosomal studies have determined  
160 that the *S. undulatus* karyotype is  $2N = 22$  with a haploid genome of  $N = 11$  (six  
161 macrochromosomes + five microchromosomes; 6M + 5m) [31, 43]. Sorting the top 11  
162 scaffolds by size (Figure 2b) suggests that scaffolds 1-6 are the macrochromosomes (170-  
163 383 Mb in size) and scaffolds 7-11 are the five microchromosomes (13-52 Mb in size)  
164 (Figure 2b). These results suggest that the first 11 scaffolds represent the 11 chromosomes,  
165 although the assembly also produces 45,000 tiny scaffolds between 0.85KB – 7MB that may  
166 still contain relevant chromosomal segments that could not be assembled.

167 To assess the completeness of the three genome assemblies, we utilized the BUSCO  
168 (Benchmarking Universal Single-Copy Orthologues) Tetrapoda dataset (3950 genes) [44,  
169 45]. For all three assemblies we found over 89% of BUSCO genes complete (Table 1) with  
170 only minor differences in BUSCO genes between the SuperNova, HiRise, and PBjelly  
171 Assemblies (89.5%, 90.2%, 90.9% complete). This suggests that the initial SuperNova  
172 Assembly captured nearly all of the genomic content despite having considerably shorter  
173 scaffolds (Table 1). The small increase in success with the more contiguous assemblies  
174 appears to be the result of a reduction in fragmented BUSCO genes with increasing data. In  
175 the SuperNova Assembly 6.4% of BUSCO genes were present as fragments whereas only  
176 5.5% and 5.0% are present as fragments in the HiRise and PBjelly Assemblies, respectively,  
177 thus explaining the 1.4% difference in complete BUSCO genes present. Interestingly, there  
178 was a 0.2% (i.e., 8 genes) increase in missing BUSCO genes from the SuperNova to the  
179 HiRise Assembly. In the PBjelly Assembly (SceUnd1.0), the BUSCO genes are almost all  
180 found on the largest 11 scaffolds (Figure 2c), as we would predict if those scaffolds  
181 correspond to chromosomes. Most of the BUSCO genes on the smaller scaffolds were  
182 duplicated. Even so, there are a small number of complete and fragmented BUSCO genes  
183 present on a handful of the tiny scaffolds (Figure 2c), suggesting that these scaffolds  
184 contain pieces of the chromosomes that were not properly assembled.

### 185 ***De novo assembly and annotation of the Sceloporus undulatus transcriptome***

186 Samples used for the *de novo* transcriptome were obtained from three gravid females of  
187 *Sceloporus undulatus* collected in Edgefield County, South Carolina (33.7°N, 82.0°W) and  
188 transported to Arizona State University. These animals were maintained under conditions  
189 described in previous publications [46, 47], which were approved by the Institutional  
190 Animal Care and Use Committee (Protocol #14-1338R) at Arizona State University.

191 Approximately two days after laying eggs, each lizard was euthanized by injecting sodium  
192 pentobarbital into the coelomic cavity. Whole brain and skeletal muscle samples were  
193 removed and placed in RNA-lysis buffer (mirVana miRNA Isolation Kit, Ambion) and flash-  
194 frozen. Additionally, three early-stage embryos from each clutch were dissected, pooled  
195 together, homogenized in RNA-lysis buffer, and also flash frozen.

196 Total RNA was isolated from the embryo and three tissue samples from each adult female  
197 (whole brain, skeletal muscle) using the mirVana miRNA Isolation Kit (Ambion) total RNA  
198 protocol. Samples were checked for quality on a 2100 Bioanalyzer (Agilent). One sample  
199 from each tissue was selected for RNAseq based on the highest RNA Integrity Number  
200 (RIN), with a minimum cutoff of 8.0. For each selected sample, 3  $\mu$ g of total RNA was sent to  
201 the University of Arizona Genetics Core (Tucson, AZ) for library preparation with TruSeq  
202 v3 chemistry for a standard insert size. RNA samples were multiplexed and sequenced  
203 using an Illumina HiSeq 2000 to generate 100-bp paired-end reads. Publicly available raw  
204 Illumina RNAseq reads from *S. undulatus* liver (juvenile male) were also added to our  
205 dataset [48, 49]. After removing adapters, raw reads from the four tissues were evaluated  
206 using FastQC (<https://github.com/s-andrews/FastQC>) and trimmed using Trimmomatic v-  
207 0.32 [50], filtering for quality score ( $\geq$ Q20) and using HEADCROP:9 to minimize nucleotide  
208 bias. This procedure yielded 179,374,469 quality-filtered reads. Table 2 summarizes read-  
209 pair counts from whole brain, skeletal muscle, whole embryos, and liver.

210 All trimmed reads were pooled and assembled *de novo* using Trinity v-2.2.0 with default k-  
211 mer size of 25 [51, 52]. From the final transcriptome, a subset of contigs containing the  
212 longest open reading frames (ORFs), representing 123,323 transcripts, was extracted from  
213 the *de novo* transcriptome assembly using TransDecoder v-3.0.0  
214 (<http://transdecoder.github.io>) with homology searches against the databases  
215 UniProtKB/SwissProt [53] and PFAM [54]. The transcriptome was annotated using  
216 Trinotate v-3.0 (<http://trinotate.github.io>), which involved searching against multiple  
217 databases (as UniProtKB/SwissProt, PFAM, signalP, GO) to identify sequence homology and  
218 protein domains, as well as to predict signaling peptides. This pooled Tissue-Embryo  
219 Transcriptome and annotation are provided as supplemental files.

220 The most comprehensive transcriptome, obtained using reads from four tissues, consists of  
221 547,370 contigs with an average length of 781.5 nucleotides (Table 2) — shorter than  
222 other assemblies because of the range of contig sizes that varied among datasets (1, 3 and 4  
223 tissues; Table S1, Fig. S1). The N50 of the most highly expressed transcripts that represent

224 90% of the total normalized expression data (E90N50) was lowest in the assembly based  
225 on one tissue (Table 2).

226 To validate the *de novo* transcriptome data, trimmed reads from the 4 tissues used for RNA  
227 sequencing (brain, skeletal muscle, liver and whole embryos) were aligned back to the  
228 Trinity assembled contigs using Bowtie2 v2.2.6 [55]. From the 176,086,787 reads that  
229 aligned, 97% represented proper pairs (Table S2), indicating good read representation in  
230 the *de novo* transcriptome assembly. To assess quality and completeness of the assemblies,  
231 we first compared the *de novo* assembled transcripts with the BUSCO Tetrapoda dataset,  
232 with BLAST+ v2.2.31 [56] and HMMER v3.1b2 [57] as dependencies. This procedure  
233 revealed that the *de novo* transcriptome assembly captured 97.1% of the expected  
234 orthologues (sum of completed and fragmented), a result comparable to the 97.8%  
235 obtained for the green anole transcriptome using 14 tissues [58] (Table 3). Next, nucleotide  
236 sequences of *de novo* assembled transcripts with the longest ORFs were compared to the  
237 protein set of *Anolis carolinensis* (AnoCar2.0, Ensembl) using BLASTX (evalue=1e-20,  
238 max\_target\_seqs=1). This comparison showed that 11,223 transcripts of *S. undulatus* have  
239 nearly full-length (>80%) alignment coverage with *A. carolinensis* proteins (Table S3).  
240 Predicted proteins of *S. undulatus* were also used to identify 13,422 one-to-one orthologs  
241 with proteins of *A. carolinensis* through reciprocal BLAST (evalue=1e-6,  
242 max\_target\_seqs=1). Table 4 summarizes the *de novo* transcriptome annotation results.

### 243 ***Genome Assembly Annotation***

244 Using the top 24 largest scaffolds of the SceUnd1.0 assembly (we refer to this set as  
245 SceUnd1.0\_top24), we used the Funannotate v1.5.0 pipeline  
246 (<https://github.com/nextgenusfs/funannotate>) for gene prediction and functional  
247 annotation. Funannotate uses RNAseq data and the Tetrapoda BUSCO [44] dataset to train  
248 the *ab initio* gene prediction programs Augustus [59] and GeneMark-ET [60]. Evidence  
249 Modeler is used to generate the consensus from Augustus and GeneMark-ES/ET. In the  
250 training step, we used four raw RNAseq datasets described in Table 2 that contained a total  
251 of 68 sequenced libraries. tRNAscan-SE [61] was used to predict tRNA genes. Finally the  
252 genes were functionally annotated via InterProScan [62], EggNOG [63], PFAM [54],  
253 UniProtKB [64], MEROPS [65], CAZyme, and GO ontology. We also used DIAMOND blastp  
254 [66] to compare the predicted proteins to ENSEMBL human, chicken, mouse, and gene  
255 anole lizard databases (Supplemental files: SceUnd1.0\_top24.gff3;  
256 SceUnd1.0\_top24\_CompliedAnnotation.csv). Our annotation pipeline predicted 54,149  
257 genes, 15,472 of which were attributed meaningful functional annotation beyond



258 “hypothetical protein”. Through BLAST of the predicted protein coding genes we found  
259 21,050 (39%) had hits in ENSEMBL. We then quantified the number of BUSCO genes  
260 identified in the predicted proteins from the Funannotate pipeline and found 79.1%, which  
261 corresponds to an 11.6% decrease from the number of complete BUSCO genes in the  
262 SceUnd1.0 genome assembly, which suggests this first version of annotation can be  
263 improved.

264 We used annotation and sequence homology to identify the X chromosome. Sex  
265 chromosomes are highly variable among *Sceloporus* species, and the genus appears to have  
266 evolved multiple XY systems independently [31]. However, some species, including *S.*  
267 *undulatus*, do not appear to have morphologically distinct sex chromosomes [67]. While the  
268 ancestral condition is heteromorphic chromosomes with a minute Y, many species within  
269 the genus demonstrate multiple sex chromosome heteromorphisms (i.e. multiple forms of  
270 the X chromosome) or have evolved indistinct sex chromosomes, such as the *undulatus*  
271 species group [18]. To identify the scaffold likely representing the X chromosome within *S.*  
272 *undulatus*, we blasted 16 X-linked genes from the green anole downloaded from Ensembl  
273 (AnoCar2.0: ACAD10, ADORA2A, ATP2A2, CCDC92, CIT, CLIP1, CUX2, DGCR8, FICD, MLEC,  
274 MLXIP, ORAI1, PLBD2, PUS1, TMEM119, ZCCHC8) [68, 69] to the SceUnd1.0. They almost  
275 exclusively map to the tenth largest scaffold, the fourth predicted microchromosome  
276 (Figures 2b, 3), indicating that it is likely the X chromosome. The Y chromosome could not  
277 be independently identified from the assembly, most likely due to the homomorphic nature  
278 of *S. undulatus* sex chromosomes; higher sequence homology may have caused the Y  
279 chromosome to assemble with the X chromosome [31].

## 280 **Mitochondrial Genome Assembly**

281 The mitochondrial genome was not captured by the genome sequencing approaches, likely  
282 due to how these types of libraries are prepared. Mitochondrial sequence data obtained via  
283 RNAseq can be effectively assembled into whole mtDNA genomes [70-73]. We used  
284 RNAseq reads from 18 *S. undulatus* individuals from the RNAseq Dataset 4 (Table 2), which  
285 are from the same population as the individuals used for the genome sequencing. We used  
286 Trimmomatic v0.37 [50] to clean the raw reads and then mapped the clean reads to a  
287 complete *S. occidentalis* mtDNA genome [74] using BWA v0.7.15 [75]. Of the 632,987,330  
288 total cleaned reads, 9.73% mapped to the *S. occidentalis* mtDNA genome with an average  
289 read depth of 5,164.42 reads per site per individual. After sorting and indexing mapped  
290 reads with SAMTOOLS v1.6 [76], we used the mpileup function in SAMTOOLS to build a  
291 consensus mitochondrial genome (mtGenome) excluding the reference and filling the no-

292 coverage regions with “N” to generate 100% coverage of the mtGenome based on the  
293 consensus across the 18 individuals. We mapped the consensus genome to the well-  
294 annotated *Anolis carolinensis* mtGenome with MAFFT v1.3.7 [77] and transferred the  
295 annotation using the “copy annotation” command in GENEIOUS v.11.1.5 [78]. Annotations  
296 from the *A. carolinensis* mtGenome (17,223 bp) transferred well to the newly assembled *S.*  
297 *undulatus* mtGenome (17,072 bp), with 13 protein coding genes, 22 tRNA regions, 2 rRNA  
298 regions, and a control region (see full list in Supplemental File). The mitochondrial genome  
299 and the annotation are provided as supplemental data.

300 ***Addressing reference assembly quality using population-level transcriptomic and***  
301 ***genomic data***

302 In developing the high-quality reference genome for *S. undulatus*, we produced three  
303 assemblies using increasing amounts of data, for correspondingly greater costs. To assess  
304 the utility of each of the assemblies for addressing ecological genomic questions, we use  
305 two datasets: RNAseq and whole genome resequencing.

306 First, we used RNAseq Dataset 4 (Table 5) from n= 18 males that were sampled from the  
307 same population (Alabama) as the individuals that were used to develop the reference  
308 assemblies; we then used these data to test whether the percentage of reads that mapped  
309 to the reference varied depending on which assembly we used as a reference. RNAseq data  
310 were cleaned with Trimmomatic v0.37 [50] and mapped with HISAT2 v2.1.0 [79] to each of  
311 the three *S. undulatus* genome assemblies. The percentage of reads that mapped were  
312 calculated using SAMTOOLS v1.6 flagstat [76]. We found negligible differences in mapping  
313 the RNAseq data to the SuperNova, HiRise and PBJelly assemblies where 81.49%, 82.37%,  
314 and 82.28% of cleaned reads mapped, respectively (Table 6).

315 Second, we prepared genomic DNA libraries for massively parallel sequencing for n=10 *S.*  
316 *undulatus* individuals (6 females, 4 males) from the same Alabama population as the  
317 individuals that were used to develop the reference assemblies. We also prepared libraries  
318 for n=5 *S. undulatus* individuals (1 female, 4 males) from Edgar Evins, Tennessee, and for  
319 n=5 individuals (2 females, 3 males) from St. Francis, Arkansas. This Arkansas population is  
320 at the borders of the *S. undulatus* and *S. consobrinus* geographic distributions making its  
321 taxonomic status uncertain [18]. Specifically, we followed standard protocols for tissue  
322 DNA extraction from toe and/or tail clips with OMEGA EZNA Tissue spin-column kits. We  
323 then prepared sequencing libraries using the Illumina TruSeq Nano kit. We multiplexed  
324 these libraries with other individuals not included in this analysis and sequenced the

325 library pool across two Illumina NovaSeq 6000 S4 sequencing runs. Five individuals from  
326 each of the three populations were sequenced to ~20x average read coverage; the  
327 remaining five individuals from Alabama were sequenced to lower coverage (~3x). Raw  
328 sequence read data were trimmed with Trimmomatic [50] and mapped separately to each  
329 of the three *S. undulatus* assemblies with bwa\_mem [75] to each of the assemblies.  
330 SAMTOOLS flagstat [76] was used to calculate the total number of alignments in the .sam  
331 files generated during mapping and the number of shotgun reads that mapped to each  
332 assembly. The CollectWgsMetrics tool from the Picard Toolkit [80] was used to calculate  
333 genome-wide coverage of the mapped reads for each individual and assembly. For all  
334 sequencing depths and populations, we observed that fewer total alignments to the PBjelly  
335 Assembly than to either the HiRise or Supernova Assemblies (Table 6). Even though there  
336 were <0.5% fewer total reads that passed QC with the PBjelly Assembly/ SceUnd1.0, a  
337 higher percentage of the QC-passed reads mapped to this assembly than to either the  
338 HiRise or Supernova Assemblies (Table 6). We also determined that individuals from the  
339 same population as the *S. undulatus* individuals used to create these reference assemblies  
340 had a higher percentage of reads map to the assemblies than individuals from the  
341 Tennessee or Arkansas populations (Table 6). Those reads had lower whole-genome  
342 coverage and lower theoretical HET SNP sensitivity (i.e., sites that have increased rates of  
343 heterozygosity and might be SNPs) when mapped to the PBjelly/ SceUnd1.0 Assembly than  
344 either the HiRise or Supernova Assemblies (Table 6).

345 Both the RNAseq and the whole genome resequencing datasets support the conclusion that  
346 the 10X Chromium data that was used for the SuperNova Assembly covered the genome  
347 and that the HiC data (included in the HiRise Assembly) and the PacBio data (included in  
348 the final PBjelly Assembly) did not increase the amount of sequence information. Rather,  
349 the use of the HiC data and PacBio data resulted in larger scaffolds and thereby slightly  
350 increased SNP sensitivity.

### 351 ***Assembly and refinement of genomic data for 34 additional Sceloporus species***

352 Draft reduced representation genomes are available for 34 species within *Sceloporus* [81,  
353 82] (phylogeny in Figure 4a). We downloaded the raw genomic reads for these 34  
354 *Sceloporus* species from the Sequence Read Archive (Study Accession SRP041983; Table 7).  
355 Genomic resources for 33 of the species were obtained using reduced representation  
356 libraries (yielding approximately 5 Gb per species), while one species, *S. occidentalis*, was  
357 sequenced using whole genome shotgun sequencing (40.88 Gb; Table 7)[81]. To improve  
358 the draft assemblies for these 34 species, we mapped these raw reads to the final assembly,

359 SceUnd1.0, using BWA-MEM [83]. Only the 11 longest, putative chromosome scaffolds from  
360 the SceUnd1.0 were used. The GATK version 3 [84-86] RealignerTargetCreator and  
361 IndelRealigner tools were used for local realignment, and HaplotypeCaller was used to  
362 identify insertion/deletion (INDEL) and single nucleotide polymorphism (SNP) variants.  
363 These sequence variants were separated and filtered with the SelectVariants and  
364 VariantFiltration tools using the GATK base settings. BEDTools [87] 'genomecov' tool was  
365 used to calculate coverage and identify regions with no coverage. We generated consensus  
366 sequences for each species by writing variants back over the reference fasta and replacing  
367 nucleotides with no coverage with "N", using BCFtools [76] 'consensus' for SNPs and  
368 BEDTools 'maskfasta' for indels and regions with no mapping coverage (Supplemental  
369 Code File).

370 Mapping the reduced representation genome data from the 33 additional *Sceloporus*  
371 species improved the assemblies for the species. For the species with ~5Gb of sequencing  
372 data, this improvement was from an average of 1.23% to an average of 44.4% coverage,  
373 and *S. occidentalis* with 41Gb of data improved from 61.0% to 88.7% coverage (Table 7).  
374 Across the 33 species with 5Gb of data, the BUSCO genes identified (complete and  
375 fragmented) in the reference-based assemblies ranged from 0.5 to 71.9% (complete and  
376 fragmented), whereas *S. occidentalis* had 95.9% BUSCO genes (complete and fragmented)  
377 identified, similar to our *S. undulatus* SuperNova Assembly (Table 7). Notably, across the  
378 *Sceloporus* genus, the percent of the raw data that mapped to the reference was  
379 significantly negatively correlated with divergence time to the reference *S. undulatus*  
380 ( $p < 0.0001$ ,  $r = 0.779$ ; Figure 4b). For species that are less than ~20 million years diverged  
381 from *S. undulatus* >90% of reads mapped; the percentage of reads mapped declined to 75%  
382 when divergence was greater than 35 million years (Figure 4b).

383 It is important to note that the reference-based assemblies produced for these 34 species  
384 will correspond 1:1 with the synteny of the *S. undulatus* scaffolds. However, *Sceloporus* is  
385 unique among squamates for remarkable chromosome rearrangements with karyotypes  
386 ranging from  $2N=22$  to  $2N=46$  [31]. Therefore, the genome assemblies for species with  
387 karyotypes other than  $2N=22$  (the *S. undulatus* reference) or with large  
388 chromosomal inversions will not be reliable for addressing questions related to  
389 genomic architecture or structural variation [88]. These genome assemblies will, however,  
390 prove useful for analyses of protein and gene sequence evolution and for mapping and  
391 pseudomapping-based RNAseq analyses of gene expression across the genus to understand  
392 behavioral ecology, physiology, developmental biology, and more.

### 393 ***Analysis of synteny with other squamate chromosome-level genomes***

394 As another benchmark of genome completeness, and to generate an initial look at  
395 chromosome evolution among squamates, we performed synteny analysis of the Eastern  
396 fence lizard (*S. undulatus*) SceUnd1.0 assembly with the green anole (*Anolis carolinensis*,  
397 AnoCar2.0) and with recently published chromosome-level assemblies for the Burmese  
398 python (*Python bivittatus*) [89] and the Argentine black and white tegu lizard (*Salvator*  
399 *merianae*) [42] (available at <https://www.dnazoo.org/>). The SceUnd1.0 scaffolds  
400 representing the 11 putative chromosomes were used to produce 1000 bp-long markers  
401 excluding gapped regions. Using BLAST, these markers were compared to the predicted  
402 chromosomes from the python and tegu HiC assemblies. BLAST hits for each were filtered  
403 to only include hits that were 80% identity, at least 500bp long, and part of 4 consecutive  
404 hits from the same Eastern fence lizard chromosome. Using these results, the Eastern fence  
405 lizard chromosomes were painted onto the anole, python, and tegu chromosomes to  
406 visualize large-scale synteny (Figure 3).

407 From this marker-based synteny painting, we found that Eastern fence lizard has fewer  
408 chromosomes than each of the other three species, corresponding to known karyotypes for  
409 these species. Notably, many of the differences in the Eastern fence lizard relative to the  
410 other species are the result of fusion of microchromosomes (e.g. compare tegu  
411 microchromosomes 1 and 9 to Eastern fence lizard microchromosome 3) or occasionally of  
412 a microchromosome to macrochromosomes (e.g. compare tegu macrochromosomes 6 and  
413 7 and microchromosomes 2 and 5 to the Eastern fence lizard macrochromosome 6),  
414 although the synteny of the macrochromosomes was largely conserved.

415 The putative sex chromosome in the SceUnd1.0 assembly (Figure 3) is syntenic to the anole  
416 X chromosome, and a microchromosome in each of the other two squamates. However, it is  
417 not syntenic to the python X chromosome, which is syntenic to the Z chromosome in other  
418 snakes. The tegu sex chromosome has not been identified.

### 419 **Discussion**

420 For the advancement of reptilian genomic and transcriptomic resources, we provide a high-  
421 quality, chromosome-level genome assembly for the Eastern fence lizard, *Sceloporus*  
422 *undulatus*, *de novo* transcriptomes for *S. undulatus* encompassing multiple tissues and life  
423 stages, and improved draft genome assemblies from 34 additional *Sceloporus* species. In  
424 the final reference assembly, SceUnd1.0, the largest 11 scaffolds contain 92.6% (1.765 of

425 1.905 Gb) of the genome sequence; these 11 scaffolds likely represent the 6 macro- and 5  
426 microchromosomes of *S. undulatus*, based on karyotype, genome size, BUSCO analysis, and  
427 synteny with other squamate genomes. The remaining small scaffolds may contain some  
428 chromosome segments that could not be assembled, misassembled regions, and/or  
429 duplicated genes.

430 In comparing the three levels of reference genome assemblies, we found that the first level  
431 using only the 10X Genomics and the SuperNova Assembly contained all, or very nearly all,  
432 of the protein-coding regions of the genome within its contigs (based on BUSCO and  
433 mapping of RNAseq and whole genome resequencing data). By including the Hi-C data, the  
434 contiguity of the HiRise Assembly dramatically improved, joining contigs into  
435 chromosome-length scaffolds, but had minimal effect on mapping percentages for either  
436 RNAseq or WGS. The inclusion of the PacBio data in the final PBJelly Assembly to produce  
437 SceUnd1.0 closed some gaps but yielded a relatively small improvement after the already  
438 dramatic improvements from the Hi-C data.

439 While it is now becoming possible to obtain a reference genome assembly for almost any  
440 organism, the quality and cost of reference genome assemblies vary considerably  
441 depending on the technologies used. This presents researchers with an important question:  
442 what levels of sequencing effort and assembly quality are required for a particular  
443 ecological genomics study? Important factors that must be considered include the  
444 sequencing depth, sequence contiguity, and thoroughness of annotation. Our study  
445 demonstrates that the SuperNova Assembly was sufficient for mapping RNAseq and whole  
446 genome resequencing, while the more expensive assemblies (HiRise and PBJelly) were  
447 necessary to achieve high-level continuity and chromosome-level scaffolding.

448 Genome assemblies of high-quality and contiguity are critical for understanding organismal  
449 biology in a wide range of contexts that includes behavior, physiology, ecology, and  
450 evolution, on scales ranging from populations to higher-level clades. From RNAseq to ChIP-  
451 seq and epigenetics, large-scale sequencing is rapidly becoming commonplace in ecological  
452 genomics to address fundamental questions of how organisms directly respond to their  
453 environment and how populations evolve in response to environmental variation. Many  
454 advanced molecular tools are typically reserved for traditional model organisms but with  
455 the large foundation of ecological and physiological data available for *S. undulatus*, a high-  
456 quality reference genome opens the door for these molecular techniques to be used in this  
457 ecological model organism. For example, with the recent demonstration of CRISPR-Cas9  
458 gene modification in a lizard, the brown anole [90], a genome reference will facilitate the

459 application of gene drive technologies for functional genomic studies in *Sceloporus* lizards.  
460 This reference will provide a foundation for whole genome studies to understand  
461 speciation and hybridization among closely related species utilizing low coverage re-  
462 sequencing, or as a point of comparison with more distantly related species relative to the  
463 chromosomal inversions and large-scale genome architectural changes common in the  
464 clade. *Sceloporus undulatus* and other lizards in the genus *Sceloporus* exhibit evolutionary  
465 reversals in sexual size dimorphism and dichromatism and they have been used to  
466 demonstrate that androgens such as testosterone can inhibit growth in species (such as *S.*  
467 *undulatus*) in which females are the larger sex [19, 91-93]. This SceUnd1.0 chromosome-  
468 level genome assembly would support ChIPseq or *in silico* analyses to identify sex hormone  
469 response elements. In addition, this assembly will facilitate the identification of signatures  
470 of exposure to environmental stressors in both gene expression and epigenetic  
471 modification [94] to evaluate pressing questions on how climate change and invasive  
472 species affect local fauna. All of these uses for a chromosome-level genome assembly  
473 provide valuable extensions to ongoing work in the *Sceloporus* genus.

#### 474 **Availability of Supporting Data**

- 475 1. All three genome assemblies are provided as supplemental data
- 476 a. SuperNova assembly containing data from 10X Genomics Chromium:  
477 GenomeAssembly\_SuperNova\_Sceloporus\_undulatus\_pseudohap.fasta.gz
- 478 b. HiRise assembly containing the 10X Genomics data with the addition of the  
479 Hi-C data:  
480 GenomeAssembly\_HiRise\_Sceloporus\_undulatus.fasta.gz
- 481 c. PBjelly Assembly (SceUnd1.0) containing the 10X Genomics data, the Hi-C  
482 data, with the addition of PacBio data:  
483 GenomeAssembly\_SceUnd1.0\_PBJELLY.fasta.gz
- 484 2. Tissue-Embryo Transcriptomes and annotation are provided as supplemental data.
- 485 a. Transcriptome File: TranscriptomeAssembly\_Tissues-Embryo\_Trinity.fasta
- 486 b. Annotation File: TranscriptomeAssembly\_Tissues-  
487 Embryo\_Transdecoder.gff3
- 488 3. Truncated assembly used for annotation pipeline (SceUnd1.0\_top24)
- 489 a. SceUnd1.0\_top24.fasta. This file contains only the longest 24 scaffolds and  
490 they have been renamed 1-24 from longest to shortest.
- 491 b. Funannotate Folder: contains that annotation files
- 492 c. SceUnd1.0\_top24\_CompiledAnnotation.csv
- 493 4. The mitochondrial genomes and the annotation are provided as supplemental data.
- 494 a. MitoGenomeAssembly\_Sceloporus\_undulatus.fasta
- 495 b. MitoGenomeAssembly\_Sceloporus\_undulatus\_Annotation.gff
- 496 5. The reference-based assemblies for the 34 *Sceloporus* species.

- 497 a. GenomeAssemblies\_34Sceloporus.tar.gz
- 498 b. Code for generated consensus sequences for each species: mkgenome\_AW-
- 499 AC.sh

## 500 **Competing Interests**

501 None Declared

## 502 **Funding**

503 This work was supported by NSF GRFP (DGE 1414475 to AC; DGE 1255832 to APS); NSF  
504 BCS-1554834 to GHP; NSF-IOS-PMB 1855845 to ADL; NSF-IOS-1456655 to TL; Clemson  
505 University lab funds to MS; Georgia Southern Startup Funds to CLC; University of Virginia  
506 start-up funding to RMC; Hatch Multistate W3045 project no. NJ17240 to HJA; Grant for  
507 Postdoctoral Interdisciplinary Research in the Life Sciences from the School of Life Sciences  
508 at Arizona State University to MT; Auburn University Start-up Funds to TSS

509

## 510 **Acknowledgements**

511 We are grateful for the support of the DoveTail Genomics and Auburn University Office of  
512 Information Technology and Hopper High-Performance Computing Cluster for assistance with  
513 this work. We thank Kirsty MacLeod for catching the adult male used for sequencing,  
514 sequencing and Juan Rodriguez for bioinformatic assistance.

515 .

## 516 **Authors' Contributions**

517 **AW:** Data curation; Formal analysis; Investigation; Validation; Visualization; Writing – original;  
518 Writing – review & editing  
519 **RST:** Conceptualization; Data curation; Formal analysis; Investigation; Validation;  
520 Visualization; Writing – review & editing



521 **MBG:** Data curation; Formal analysis; Investigation; Validation; Visualization; Writing –  
522 original; Writing – review & editing  
523 **DSW:** Data curation; Formal analysis; Software; Validation; Visualization; Writing – original;  
524 Writing – review & editing  
525 **DYS:** Formal analysis; Software; Writing – original; Writing – review & editing  
526 **RK:** Methodology, Formal analysis, Writing- original draft, Writing- review & editing  
527 **AC:** Data curation; Formal analysis; Methodology; Software, Validation, Visualization  
528 **APS:** Formal analysis; Writing – original draft; Writing – review & editing  
529 **CLC:** Conceptualization; Data Curation; Investigation; Funding Acquisition; Writing-review &  
530 editing  
531 **GP:** Funding acquisition; Supervision, Writing – review & editing.  
532 **MT:** Data curation; Formal analysis; Methodology; Funding acquisition; Writing – review &  
533 editing  
534 **TL:** Conceptualization; Funding acquisition; Resources; Writing – review & editing  
535 **KK:** Conceptualization; Funding acquisition; Resources; Writing – review & editing  
536 **MWS:** Resources; Funding Acquisition; Writing- review & editing  
537 **ADL:** Conceptualization; Data curation; Funding acquisition; Methodology; Writing –  
538 original; Writing – review & editing  
539 **MJA:** Conceptualization; Funding acquisition; Writing – review & editing  
540 **MEG:** Conceptualization; Writing – review & editing  
541 **HJA:** Investigation; Funding acquisition; Writing – review & editing  
542 **RMC:** Conceptualization; Funding acquisition; Investigation; Writing – review & editing  
543 **TSS:** Conceptualization; Data curation; Funding acquisition; Investigation; Project  
544 Administration; Resources; Supervision; Writing – original; Writing – review & editing.  
545 All authors have read and approved the final version of the manuscript.

## 546 **References**

547 1. Seebacher F. A review of thermoregulation and physiological performance in  
548 reptiles: what is the role of phenotypic flexibility? *Journal of Comparative*

- 549 Physiology B: Biochemical, Systemic, and Environmental Physiology. 2005;175  
550 7:453-61.
- 551 2. Kearney M, Fujita MK and Ridenour J. Lost Sex in the Reptiles: Constraints and  
552 Correlations. In: Schön I, Martens K and Dijk P, editors. Lost Sex: The Evolutionary  
553 Biology of Parthenogenesis. Dordrecht: Springer Netherlands; 2009. p. 447-74.
- 554 3. Van Dyke JU, Brandley MC and Thompson MB. The evolution of viviparity: molecular  
555 and genomic data from squamate reptiles advance understanding of live birth in  
556 amniotes. *Reproduction*. 2014;147 1:R15-26. doi:10.1530/REP-13-0309.
- 557 4. Rhen T and Schroeder A. Molecular mechanisms of sex determination in reptiles.  
558 *Sex Dev*. 2010;4 1-2:16-28. doi:10.1159/000282495.
- 559 5. Sarre SD, Ezaz T and Georges A. Transitions between sex-determining systems in  
560 reptiles and amphibians. *Annu Rev Genomics Hum Genet*. 2011;12:391-406.  
561 doi:10.1146/annurev-genom-082410-101518.
- 562 6. Bergmann PJ and Morinaga G. The convergent evolution of snake-like forms by  
563 divergent evolutionary pathways in squamate reptiles. *Evolution*. 2019;73 3:481-96.  
564 doi:10.1111/evo.13651.
- 565 7. Liu Y, Zhou Q, Wang Y, Luo L, Yang J, Yang L, et al. Gekko japonicus genome reveals  
566 evolution of adhesive toe pads and tail regeneration. *Nat Commun*. 2015;6:10033.  
567 doi:10.1038/ncomms10033.
- 568 8. Andrew AL, Perry BW, Card DC, Schield DR, Ruggiero RP, McGaugh SE, et al. Growth  
569 and stress response mechanisms underlying post-feeding regenerative organ  
570 growth in the Burmese python. *BMC Genomics*. 2017;18 1:338.  
571 doi:10.1186/s12864-017-3743-1.
- 572 9. Janes DE, Organ CL and Fujita MK. Genome evolution in Reptilia, the sister group of  
573 mammals. *Annual review of genomics and human genetics*. 2010;11:239-64. doi:doi:  
574 10.1146/annurev-genom-082509-141646.
- 575 10. Alfoldi J, Di Palma F, Grabherr M, Williams C, Kong L, Mauceli E, et al. The genome of  
576 the green anole lizard and a comparative analysis with birds and mammals. *Nature*.  
577 2011;477 7366:587-91. doi:10.1038/nature10390.
- 578 11. Georges A, Li Q, Lian J, O'Meally D, Deakin J, Wang Z, et al. High-coverage sequencing  
579 and annotated assembly of the genome of the Australian dragon lizard *Pogona*  
580 *vitticeps*. *Gigascience*. 2015;4:45. doi:10.1186/s13742-015-0085-2.

- 581 12. Xiong Z, Li F, Li Q, Zhou L, Gamble T, Zheng J, et al. Draft genome of the leopard  
582 gecko, *Eublepharis macularius*. *Gigascience*. 2016;5 1:47. doi:10.1186/s13742-016-  
583 0151-4.
- 584 13. Lind AL, Lai YYY, Mostovoy Y, Holloway AK, Iannucci A, Mak ACY, et al. Genome of  
585 the Komodo dragon reveals adaptations in the cardiovascular and chemosensory  
586 systems of monitor lizards. *Nat Ecol Evol*. 2019;3 8:1241-52. doi:10.1038/s41559-  
587 019-0945-8.
- 588 14. Olmo E. Trends in the evolution of reptilian chromosomes. *Integr Comp Biol*.  
589 2008;48 4:486-93. doi:10.1093/icb/icn049.
- 590 15. Hedges SB, Marin J, Suleski M, Paymer M and Kumar S. Tree of life reveals clock-like  
591 speciation and diversification. *Mol Biol Evol*. 2015;32 4:835-45.  
592 doi:10.1093/molbev/msv037.
- 593 16. Zhang G, Li C, Li Q, Li B, Larkin DM, Lee C, et al. Comparative genomics reveals  
594 insights into avian genome evolution and adaptation. *Science*. 2014;346 6215:1311.  
595 doi:10.1126/science.1251385.
- 596 17. Pasquesi GIM, Adams RH, Card DC, Schield DR, Corbin AB, Perry BW, et al. Squamate  
597 reptiles challenge paradigms of genomic repeat element evolution set by birds and  
598 mammals. *Nat Commun*. 2018;9 1:2774. doi:10.1038/s41467-018-05279-1.
- 599 18. Leaché AD. Species Tree Discordance Traces to Phylogeographic Clade Boundaries  
600 in North American Fence Lizards (*Sceloporus*). *Systematic Biology*. 2009;58 6:547-  
601 59. doi:10.1093/sysbio/syp057.
- 602 19. John-Alder HB, Cox RM, Haenel GJ and Smith LC. Hormones, performance and  
603 fitness: Natural history and endocrine experiments on a lizard (*Sceloporus*  
604 *undulatus*). *Integr Comp Biol*. 2009;49 4:393-407. doi:10.1093/icb/icp060.
- 605 20. Buckley LB, Urban MC, Angilletta MJ, Crozier LG, Rissler LJ and Sears MW. Can  
606 mechanism inform species' distribution models? *Ecology Letters*. 2010;13 8:1041-  
607 54.
- 608 21. Warner DA and Andrews RM. Nest-Site Selection in Relation to Temperature and  
609 Moisture by the Lizard *Sceloporus undulatus*. *Herpetologica*. 2002;58 4:399-407.  
610 doi:10.1655/0018-0831(2002)058[0399:Nsirtt]2.0.Co;2.
- 611 22. Telemeco RS, Fletcher B, Levy O, Riley A, Rodriguez-Sanchez Y, Smith C, et al. Lizards  
612 fail to plastically adjust nesting behavior or thermal tolerance as needed to buffer  
613 populations from climate warming. *Glob Chang Biol*. 2016; doi:10.1111/gcb.13476.

- 614 23. Blackburn DG, Gavelis GS, Anderson KE, Johnson AR and Dunlap KD. Placental  
615 specializations of the mountain spiny lizard *Sceloporus jarrovi*. Journal of  
616 morphology. 2010;271 10:1153-75. doi:10.1002/jmor.10860.
- 617 24. Anderson KE, Blackburn DG and Dunlap KD. Scanning electron microscopy of the  
618 placental interface in the viviparous lizard *Sceloporus jarrovi* (Squamata:  
619 Phrynosomatidae). Journal of morphology. 2011;272 4:465-84.  
620 doi:10.1002/jmor.10925.
- 621 25. Lambert SM and Wiens JJ. Evolution of viviparity: a phylogenetic test of the cold-  
622 climate hypothesis in phrynosomatid lizards. Evolution. 2013;67 9:2614-30.  
623 doi:10.1111/evo.12130.
- 624 26. Angilletta J Michael J, Niewiarowski Peter H, Dunham Arthur E, Leaché Adam D and  
625 Porter Warren P. Bergmann's Clines in Ectotherms: Illustrating a Life-History  
626 Perspective with Sceloporine Lizards. The American Naturalist. 2004;164 6:E168-  
627 E83. doi:10.1086/425222.
- 628 27. Angilletta MJ, Oufiero CE and Leaché AD. Direct and Indirect Effects of  
629 Environmental Temperature on the Evolution of Reproductive Strategies: An  
630 Information-Theoretic Approach. American Naturalist. 2006;168 4:E123-E35.
- 631 28. Tinkle DW and Ballinger RE. *Sceloporus undulatus*: A Study of the Intraspecific  
632 Comparative Demography of a Lizard. Ecology. 1972;53 4:570-84.
- 633 29. Lawing AM, Polly PD, Hews DK and Martins EP. Including Fossils in Phylogenetic  
634 Climate Reconstructions: A Deep Time Perspective on the Climatic Niche Evolution  
635 and Diversification of Spiny Lizards (*Sceloporus*). Am Nat. 2016;188 2:133-48.  
636 doi:10.1086/687202.
- 637 30. Rosenblum EB, Parent CE, Diepeveen ET, Noss C and Bi K. Convergent Phenotypic  
638 Evolution despite Contrasting Demographic Histories in the Fauna of White Sands.  
639 The American Naturalist. 2017;190 S1:S44-S56. doi:10.1086/692138.
- 640 31. Leaché AD and Sites JW. Chromosome evolution and diversification in north  
641 american spiny lizards (Genus *Sceloporus*). Cytogenetic and Genome Research.  
642 2010;127 2-4:166-81. doi:10.1159/000293285.
- 643 32. Leache A and Reeder TW. Molecular Systematics of the Eastern Fence Lizard  
644 (*Sceloporus undulatus*): A Comparison of Parsimony, Likelihood, and Bayesian  
645 Approaches. Systematic Biology. 2002;51 1:44-68.
- 646 33. Cox RM, Butler MA and John-Alder HB. The evolution of sexual size dimorphism in  
647 reptiles. Sex, Size and Gender Roles. 2007. p. 38-49.

- 648 34. Pollock NB, Feigin S, Drazenovic M and John-Alder HB. Sex hormones and the  
649 development of sexual size dimorphism: 5alpha-dihydrotestosterone inhibits  
650 growth in a female-larger lizard (*Sceloporus undulatus*). J Exp Biol. 2017;220 Pt  
651 21:4068-77. doi:10.1242/jeb.166553.
- 652 35. Trompeter WP and Langkilde T. Invader danger: Lizards faced with novel predators  
653 exhibit an altered behavioral response to stress. Hormones and Behavior. 2011;60  
654 2:152-8. doi:<http://dx.doi.org/10.1016/j.yhbeh.2011.04.001>.
- 655 36. Graham SP, Freidenfelds NA, Thawley CJ, Robbins TR and Langkilde T. Are Invasive  
656 Species Stressful? The Glucocorticoid Profile of Native Lizards Exposed to Invasive  
657 Fire Ants Depends on the Context. Physiol Biochem Zool. 2017;90 3:328-37.  
658 doi:10.1086/689983.
- 659 37. Gifford ME, Robinson CD and Clay TA. The influence of invasive fire ants on survival,  
660 space use, and patterns of natural selection in juvenile lizards. Biological Invasions.  
661 2017;19 5:1461-9. doi:10.1007/s10530-017-1370-z.
- 662 38. Angilletta MJ, Jr., Zelic MH, Adrian GJ, Hurliman AM and Smith CD. Heat tolerance  
663 during embryonic development has not diverged among populations of a  
664 widespread species (*Sceloporus undulatus*). Conserv Physiol. 2013;1 1:cot018.  
665 doi:10.1093/conphys/cot018.
- 666 39. Buckley LB, Ehrenberger JC, Angilletta MJ and Wilson R. Thermoregulatory  
667 behaviour limits local adaptation of thermal niches and confers sensitivity to climate  
668 change. Functional Ecology. 2015;29 8:1038-47. doi:10.1111/1365-2435.12406.
- 669 40. Carlo MA, Riddell EA, Levy O and Sears MW. Recurrent sublethal warming reduces  
670 embryonic survival, inhibits juvenile growth, and alters species distribution  
671 projections under climate change. Ecol Lett. 2018;21 1:104-16.  
672 doi:10.1111/ele.12877.
- 673 41. Zheng GX, Lau BT, Schnall-Levin M, Jarosz M, Bell JM, Hindson CM, et al. Haplotyping  
674 germline and cancer genomes with high-throughput linked-read sequencing. Nat  
675 Biotechnol. 2016;34 3:303-11. doi:10.1038/nbt.3432.
- 676 42. Roscito JG, Sameith K, Pippel M, Francoijs KJ, Winkler S, Dahl A, et al. The genome of  
677 the tegu lizard *Salvator merianae*: combining Illumina, PacBio, and optical mapping  
678 data to generate a highly contiguous assembly. Gigascience. 2018;7 12  
679 doi:10.1093/gigascience/giy141.
- 680 43. Cole CJ. Chromosome Variation in North American Fence Lizards (Genus *Sceloporus*;  
681 *undulatus* Species Group). Systematic Biology. 1972;21 4:357-63.  
682 doi:10.1093/sysbio/21.4.357.

- 683 44. Simao FA, Waterhouse RM, Ioannidis P, Kriventseva EV and Zdobnov EM. BUSCO:  
684 assessing genome assembly and annotation completeness with single-copy  
685 orthologs. *Bioinformatics*. 2015;31 19:3210-2. doi:10.1093/bioinformatics/btv351.
- 686 45. Waterhouse RM, Seppey M, Simao FA, Manni M, Ioannidis P, Klioutchnikov G, et al.  
687 BUSCO applications from quality assessments to gene prediction and  
688 phylogenomics. *Mol Biol Evol*. 2017; doi:10.1093/molbev/msx319.
- 689 46. Fisher RE, Geiger LA, Stroik LK, Hutchins ED, George RM, Denardo DF, et al. A  
690 histological comparison of the original and regenerated tail in the green anole,  
691 *Anolis carolinensis*. *Anat Rec (Hoboken)*. 2012;295 10:1609-19.  
692 doi:10.1002/ar.22537.
- 693 47. Ritzman TB, Stroik LK, Julik E, Hutchins ED, Lasku E, Denardo DF, et al. The gross  
694 anatomy of the original and regenerated tail in the green anole (*Anolis carolinensis*).  
695 *Anat Rec (Hoboken)*. 2012;295 10:1596-608. doi:10.1002/ar.22524.
- 696 48. McGaugh SE, Bronikowski AM, Kuo C-H, Reding DM, Addis EA, Fligel LE, et al. Rapid  
697 molecular evolution across amniotes of the IIS/TOR network. *Proceedings of the*  
698 *National Academy of Sciences*. 2015;112 22:7055-60.  
699 doi:10.1073/pnas.1419659112.
- 700 49. McGaugh SE, Bronikowski AM, Kuo C-H, Reding DM, Addis EA, Fligel LE, et al. Data  
701 from: Rapid molecular evolution across amniotes of the IIS/TOR network. *Dryad*  
702 *Digital Repository*. <http://dx.doi.org/10.5061/dryad.vn872>. 2015.
- 703 50. Bolger AM, Lohse M and Usadel B. Trimmomatic: a flexible trimmer for Illumina  
704 sequence data. *Bioinformatics*. 2014;30 doi:10.1093/bioinformatics/btu170.
- 705 51. Grabherr MG, Haas BJ, Yassour M, Levin JZ, Thompson DA, Amit I, et al. Full-length  
706 transcriptome assembly from RNA-Seq data without a reference genome. *Nat*  
707 *Biotech*. 2011;29 7:644-52.  
708 doi:[http://www.nature.com/nbt/journal/v29/n7/abs/nbt.1883.html#supplementa](http://www.nature.com/nbt/journal/v29/n7/abs/nbt.1883.html#supplementary-information)  
709 [ry-information](http://www.nature.com/nbt/journal/v29/n7/abs/nbt.1883.html#supplementary-information).
- 710 52. Huang X, Chen XG and Armbruster PA. Comparative performance of transcriptome  
711 assembly methods for non-model organisms. *BMC Genomics*. 2016;17:523.  
712 doi:10.1186/s12864-016-2923-8.
- 713 53. Wu CH, Apweiler R, Bairoch A, Natale DA, Barker WC, Boeckmann B, et al. The  
714 Universal Protein Resource (UniProt): an expanding universe of protein  
715 information. *Nucleic Acids Res*. 2006;34 doi:10.1093/nar/gkj161.

- 716 54. Finn RD, Coggill P, Eberhardt RY, Eddy SR, Mistry J, Mitchell AL, et al. The Pfam  
717 protein families database: towards a more sustainable future. *Nucleic Acids*  
718 *Research*. 2016;44 D1:D279-D85. doi:10.1093/nar/gkv1344.
- 719 55. Langmead B and Salzberg SL. Fast gapped-read alignment with Bowtie 2. *Nat*  
720 *Methods*. 2012;9 doi:10.1038/nmeth.1923.
- 721 56. Camacho C, Coulouris G, Avagyan V, Ma N, Papadopoulos J, Bealer K, et al. BLAST+:  
722 architecture and applications. *BMC Bioinformatics*. 2009;10:421. doi:10.1186/1471-  
723 2105-10-421.
- 724 57. Eddy SR. A new generation of homology search tools based on probabilistic  
725 inference. *Genome Inform*. 2009;23.
- 726 58. Eckalbar WL, Hutchins ED, Markov GJ, Allen AN, Corneveaux JJ, Lindblad-Toh K, et al.  
727 Genome reannotation of the lizard *Anolis carolinensis* based on 14 adult and  
728 embryonic deep transcriptomes. *BMC Genomics*. 2013;14 1:49. doi:10.1186/1471-  
729 2164-14-49.
- 730 59. Stanke M, Schoffmann O, Morgenstern B and Waack S. Gene prediction in eukaryotes  
731 with a generalized hidden Markov model that uses hints from external sources. *BMC*  
732 *Bioinformatics*. 2006;7:62. doi:10.1186/1471-2105-7-62.
- 733 60. Lomsadze A, Burns PD and Borodovsky M. Integration of mapped RNA-Seq reads  
734 into automatic training of eukaryotic gene finding algorithm. *Nucleic Acids Res*.  
735 2014;42 15:e119. doi:10.1093/nar/gku557.
- 736 61. Lowe TM and Chan PP. tRNAscan-SE On-line: integrating search and context for  
737 analysis of transfer RNA genes. *Nucleic Acids Res*. 2016;44 W1:W54-7.  
738 doi:10.1093/nar/gkw413.
- 739 62. Jones P, Binns D, Chang HY, Fraser M, Li W, McAnulla C, et al. InterProScan 5:  
740 genome-scale protein function classification. *Bioinformatics*. 2014;30 9:1236-40.  
741 doi:10.1093/bioinformatics/btu031.
- 742 63. Huerta-Cepas J, Szklarczyk D, Forslund K, Cook H, Heller D, Walter MC, et al. eggNOG  
743 4.5: a hierarchical orthology framework with improved functional annotations for  
744 eukaryotic, prokaryotic and viral sequences. *Nucleic Acids Res*. 2016;44 D1:D286-  
745 93. doi:10.1093/nar/gkv1248.
- 746 64. Bateman A, Martin MJ, O'Donovan C, Magrane M, Alpi E, Antunes R, et al. UniProt:  
747 the universal protein knowledgebase. *Nucleic Acids Research*. 2017;45 D1:D158-  
748 D69. doi:10.1093/nar/gkw1099.

- 749 65. Rawlings ND, Barrett AJ, Thomas PD, Huang X, Bateman A and Finn RD. The MEROPS  
750 database of proteolytic enzymes, their substrates and inhibitors in 2017 and a  
751 comparison with peptidases in the PANTHER database. *Nucleic Acids Res.* 2018;46  
752 D1:D624-D32. doi:10.1093/nar/gkx1134.
- 753 66. Buchfink B, Xie C and Huson DH. Fast and sensitive protein alignment using  
754 DIAMOND. *Nature Methods.* 2015;12 1:59-60. doi:10.1038/nmeth.3176.
- 755 67. Sites JW, Archie JW, Cole CJ and Vilella OF. A Review of Phylogenetic Hypotheses for  
756 Lizards of the Genus *Sceloporus* (Phrynosomatidae) - Implications for Ecological and  
757 Evolutionary Studies. *Bulletin of the American Museum of Natural History.* 1992;  
758 213:1-110.
- 759 68. Rovatsos M, Altmanová M, Pokorná M and Kratochvíl L. Conserved sex  
760 chromosomes across adaptively radiated *Anolis* lizards. *Evolution.* 2014;68 7:2079-  
761 85. doi:10.1111/evo.12357.
- 762 69. Rovatsos M, Altmanová M, Pokorná MJ and Kratochvíl L. Novel X-Linked Genes  
763 Revealed by Quantitative Polymerase Chain Reaction in the Green Anole, *Anolis*  
764 *carolinensis*. *G3.* 2014;4 11:2107-13. doi:10.1534/g3.114.014084.
- 765 70. Smith DR. RNA-Seq data: a goldmine for organelle research. *Brief Funct Genomics.*  
766 2013;12 5:454-6. doi:10.1093/bfgp/els066.
- 767 71. Schwartz TS, Arendsee ZW and Bronikowski AM. Mitochondrial divergence between  
768 slow- and fast-aging garter snakes. *Exp Gerontol.* 2015;71:135-46.  
769 doi:10.1016/j.exger.2015.09.004.
- 770 72. Tian Y and Smith DR. Recovering complete mitochondrial genome sequences from  
771 RNA-Seq: A case study of *Polytomella* non-photosynthetic green algae. *Mol*  
772 *Phylogenet Evol.* 2016;98:57-62. doi:10.1016/j.ympev.2016.01.017.
- 773 73. Waits DS, Simpson DY, Sparkman AM, Bronikowski AM and Schwartz TS. The utility  
774 of reptile blood transcriptomes in molecular ecology. *Molecular Ecology Resources.*  
775 2020;20 1:308-17. doi:10.1111/1755-0998.13110.
- 776 74. Kumazawa Y. Mitochondrial DNA sequences of five squamates: phylogenetic  
777 affiliation of snakes. *DNA Research.* 2004;11 2:137-44.
- 778 75. Li H and Durbin R. Fast and accurate short read alignment with Burrows-Wheeler  
779 transform. *Bioinformatics.* 2009;25 doi:10.1093/bioinformatics/btp324.



- 780 76. Li H, Handsaker B, Wysoker A, Fennell T, Ruan J, Homer N, et al. The Sequence  
781 Alignment/Map format and SAMtools. *Bioinformatics*. 2009;25 16:2078-9.  
782 doi:10.1093/bioinformatics/btp352.
- 783 77. Katoh K and Standley DM. A simple method to control over-alignment in the MAFFT  
784 multiple sequence alignment program. *Bioinformatics*. 2016;32 13:1933-42.  
785 doi:10.1093/bioinformatics/btw108.
- 786 78. Kearse M, Moir R, Wilson A, Stones-Havas S, Cheung M, Sturrock S, et al. Geneious  
787 Basic: An integrated and extendable desktop software platform for the organization  
788 and analysis of sequence data. *Bioinformatics*. 2012;28 12:1647-9.
- 789 79. Pertea M, Kim D, Pertea GM, Leek JT and Salzberg SL. Transcript-level expression  
790 analysis of RNA-seq experiments with HISAT, StringTie and Ballgown. *Nat Protoc*.  
791 2016;11 9:1650-67. doi:10.1038/nprot.2016.095.
- 792 80. Picard Toolkit. <http://picard.sourceforge.net/>. 2019.
- 793 81. Leache AD, Harris RB, Maliska ME and Linkem CW. Comparative species divergence  
794 across eight triplets of spiny lizards (*Sceloporus*) using genomic sequence data.  
795 *Genome Biol Evol*. 2013;5 12:2410-9. doi:10.1093/gbe/evt186.
- 796 82. Arthofer W, Banbury BL, Carneiro M, Cicconardi F, Duda Thomas F, Harris RB, et al.  
797 Genomic Resources Notes Accepted 1 August 2014–30 September 2014. *Molecular*  
798 *Ecology Resources*. 2014;15 1:228-9. doi:10.1111/1755-0998.12340.
- 799 83. Li H. Aligning sequence reads, clone sequences and assembly contigs with BWA-  
800 MEM. arXiv. 2013;00 00:1-3. doi:arXiv:1303.3997 [q-bio.GN].
- 801 84. McKenna A, Hanna M, Banks E, Sivachenko A, Cibulskis K, Kernytsky A, et al. The  
802 Genome Analysis Toolkit: a MapReduce framework for analyzing next-generation  
803 DNA sequencing. *Genome Research*. 2010;20:1297-303.
- 804 85. Depristo MA, Banks E, Poplin R, Garimella KV, Maguire JR, Hartl C, et al. A  
805 framework for variation discovery and genotyping using next-generation DNA  
806 sequencing data. *Nature Genetics*. 2011;43 5:491-501. doi:10.1038/ng.806.
- 807 86. Van der Auwera GA, Carneiro MO, Hartl C, Poplin R, Del Angel G, Levy-Moonshine A,  
808 et al. From FastQ data to high confidence variant calls: the Genome Analysis Toolkit  
809 best practices pipeline. *Curr Protoc Bioinformatics*. 2013;43:11 0 1-33.  
810 doi:10.1002/0471250953.bi1110s43.
- 811 87. Quinlan AR and Hall IM. BEDTools: A flexible suite of utilities for comparing genomic  
812 features. *Bioinformatics*. 2010;26 6:841-2. doi:10.1093/bioinformatics/btq033.

- 813 88. Bedoya AM and Leaché AD. Characterization of a large pericentric inversion in  
814 Plateau Fence Lizards, (*Sceloporus tristichus*): evidence from chromosome-scale  
815 genomes. bioRxiv. 2020; doi:10.1101/2020.03.18.997676.
- 816 89. Castoe TA, de Koning APJ, Hall KT, Card DC, Schield DR, Fujita MK, et al. The  
817 Burmese python genome reveals the molecular basis for extreme adaptation in  
818 snakes. Proceedings of the National Academy of Sciences. 2013;110 51:20645-50.
- 819 90. Rasys AM, Park S, Ball RE, Alcalá AJ, Lauderdale JD and Menke DB. CRISPR-Cas9  
820 Gene Editing in Lizards through Microinjection of Unfertilized Oocytes. Cell Rep.  
821 2019;28 9:2288-92 e3. doi:10.1016/j.celrep.2019.07.089.
- 822 91. Cox RM, Skelly SL and John-Alder HB. Testosterone Inhibits Growth in Juvenile Male  
823 Eastern Fence Lizards (*Sceloporus undulatus*): Implications for Energy Allocation  
824 and Sexual Size Dimorphism. Physiological and Biochemical Zoology. 2005;78  
825 4:531-45.
- 826 92. Cox RM and John-Alder HB. Testosterone has opposite effects on male growth in  
827 lizards (*Sceloporus* spp.) with opposite patterns of sexual size dimorphism. J Exp  
828 Biol. 2005;208 Pt 24:4679-87. doi:10.1242/jeb.01948.
- 829 93. John-Alder HB, Cox RM and Taylor EN. Proximate developmental mediators of  
830 sexual dimorphism in size: case studies from squamate reptiles. Integr Comp Biol.  
831 2007;47 2:258-71. doi:10.1093/icb/icm010.
- 832 94. Schrey AW, Robbins TR, Lee J, Dukes DW, Ragsdale AK, Thawley CJ, et al. Epigenetic  
833 response to environmental change: DNA methylation varies with invasion status.  
834 Environmental Epigenetics. 2016;2 2:dvw008. doi:10.1093/eep/dvw008.
- 835

836 **Table 1.** Summary statistics across genome assemblies.

837

| <b>Metric</b>                                                                           | <b>Supernova<br/>Assembly<br/>(10X Chromium)</b> | <b>HiRise Assembly<br/>(10X Chromium + Hi-C)</b> | <b>PBJelly Assembly (SceUnd1.0)<br/>(10X Chromium + Hi-C + PacBio)</b> |            |
|-----------------------------------------------------------------------------------------|--------------------------------------------------|--------------------------------------------------|------------------------------------------------------------------------|------------|
| <b>Coverage</b>                                                                         | 46X                                              | 4859X                                            | 4859X                                                                  | 841        |
| <b>N50</b>                                                                              | 2.41 Mb                                          | 265.4 Mb                                         | 275.6 Mb                                                               | 842        |
| <b>N90</b>                                                                              | 0.241 Mb                                         | 35.4 Mb                                          | 37.1 Mb                                                                | 843        |
| <b>L50</b>                                                                              | 218 scaffold                                     | 3 scaffolds                                      | 3 scaffolds                                                            | 844        |
| <b>L90</b>                                                                              | 987 scaffolds                                    | 9 scaffolds                                      | 9 scaffolds                                                            | 845        |
| <b>Tetrapoda BUSCO<br/>(n=3950) on whole genome</b>                                     | 89.5% Complete,                                  | 90.2% Complete                                   | 90.9% Complete,                                                        | 846        |
|                                                                                         | 6.4% Fragmented                                  | 5.5% Fragmented                                  | 5.0% Fragmented                                                        | 847        |
|                                                                                         | 4.1% Missing                                     | 4.3% Missing                                     | 4.1% Missing                                                           | 848        |
| <b>Tetrapoda BUSCO<br/>(n=3950) on top 24<br/>scaffolds</b>                             |                                                  |                                                  |                                                                        | 849        |
|                                                                                         |                                                  |                                                  | 90.7% Complete,                                                        | 850        |
|                                                                                         |                                                  |                                                  | 4.9% Fragmented                                                        | 851        |
| <b>Tetrapoda BUSCO<br/>(n=3950) on predicted<br/>proteins from top 24<br/>scaffolds</b> |                                                  |                                                  | 4.4% Missing                                                           | 852        |
|                                                                                         |                                                  |                                                  |                                                                        | 853        |
|                                                                                         |                                                  |                                                  | 79.1% Complete                                                         | 854        |
| <b>Assembly Size</b>                                                                    | 1.61 Gb (1.835?)                                 | 1.836 Gb                                         | 13.7% Fragmented                                                       | 855        |
|                                                                                         |                                                  |                                                  | 7.2% Missing                                                           | 856        |
|                                                                                         |                                                  |                                                  |                                                                        | 857        |
|                                                                                         |                                                  |                                                  | 1.9056 GB with gaps                                                    | 858        |
|                                                                                         |                                                  |                                                  | 1.8586 GB without gaps                                                 | 859        |
|                                                                                         |                                                  |                                                  | Annotation: 21,050 of our predicted<br>proteins had hits in ENSEMBL.   | 860<br>861 |

863 N50 - The scaffold length such that the sum of the lengths of all scaffolds of this size or larger is equal to 50% of the total  
864 assembly length.

865 N90 - The scaffold length such that the sum of the lengths of all scaffolds of this size or larger is equal to 90% of the total

866 assembly length.

867 L50 - The smallest number of scaffolds that make up 50% of the total assembly length.

868 L90 - The smallest number of scaffolds that make up 90% of the total assembly length.

869 **Table 2.** *Sceloporus undulatus de novo* transcriptome assembly statistics. The four tissues  
870 are comprised of 3 tissues first reported in this study (brain, skeletal, and embryos) from  
871 gravid females collected in Edgefield County, SC), plus liver tissue as previously reported  
872 by McGaugh et al. 2015.  
873

| <b>Assembly</b>                   | <b>1 tissue [23]</b> | <b>3 tissues</b>   | <b>4 tissues</b>   |
|-----------------------------------|----------------------|--------------------|--------------------|
| Total of Trinity transcripts      | 158,323              | 492,249            | 547,370            |
| Total of Trinity 'genes'          | 138,031              | 422,687            | 467,658            |
| GC%                               | 43.81                | 42.85              | 42.76              |
| Contig N50                        | 1,720                | 1,648              | 1,438              |
| Contig E90N50                     | 2,254                | 2,640              | 2,550              |
| Average contig length (bp)        | 833.0                | 822.4              | 781.5              |
| Transcripts with the longest ORFs | 86,630<br>(54.7%)    | 212,172<br>(43.1%) | 217,756<br>(39.8%) |

874

875

876 **Table 3.** BUSCO results for transcriptomes of lizard species. For *S. undulatus*, the 4 tissues  
877 are the 3 tissues (brain, skeletal muscle and embryos) with the addition of 1 tissue (liver)  
878 from McGaugh et al. 2015. For *A. carolinensis*, see Eckalbar et al. 2013 for the complete list  
879 of tissues used.  
880

|                  | <i>Sceloporus undulatus</i> |            |            | <i>Anolis carolinensis</i> |
|------------------|-----------------------------|------------|------------|----------------------------|
|                  | 1 tissue                    | 3 tissues  | 4 tissues  | 14 tissues                 |
| Complete genes   | 72.5%                       | 91.7%      | 92.3%      | 96.7%                      |
| Duplicated genes | 25%                         | 43.8%      | 43.9%      | 37.9%                      |
| Fragmented genes | 9.2%                        | 4.8%       | 4.8%       | 1.1%                       |
| Missing genes    | 18.3%                       | 3.5%       | 2.9%       | 2.2%                       |
| Reference        | McGaugh et al.<br>2015      | This study | This study | Eckalbar et al, 2013       |

881  
882  
883  
884  
885

886 **Table 4.** Annotation of *Sceloporus undulatus de novo* transcriptome assembly using 4  
887 tissues. Unique annotation numbers between parentheses.

888

| <b>Annotation</b>                      |                 |
|----------------------------------------|-----------------|
| Annotated genes                        | 467,658         |
| Annotated transcript isoforms          | 547,370         |
| Annotated isoforms/gene                | 1.17            |
| Transcripts with Swiss-Prot annotation | (71,944)        |
| Transcripts with PFAM annotation       | 51,018 (46,432) |
| Transcripts with KEGG annotation       | 65,694 (21,520) |
| Transcripts with GO annotation         | 73,936 (66,554) |

889

890

891 **Table 5.** RNAseq datasets used for training in the genome annotation pipeline. Datasets 1 and 2 were used in the *de novo*  
 892 transcriptome assembly.  
 893

| Data Set                              | Tissue          | Age      | Sex    | Treatment/<br>Condition | Data<br>Type | NCBI SRA<br>Accession # |
|---------------------------------------|-----------------|----------|--------|-------------------------|--------------|-------------------------|
| <b>1. This Paper</b>                  | Skeletal muscle | Adult    | Female | Post-reproductive       | 100 bp PE    | SAMN06312743            |
|                                       | Brain           | Adult    | Female | Post-reproductive       | 100 bp PE    | SAMN06312741            |
|                                       | Whole Embryo    | Embryo   | N/A    |                         | 100 bp PE    | SAMN06312742            |
| <b>2. McGaugh<br/>et al. 2015</b>     | Liver           | Juvenile |        | Control Lab             | 100 bp PE    | SRR629640               |
| <b>3. Cox et al.<br/>In Review</b>    | Liver           | Juvenile | Female | Blank                   | 125 bp PE    | SAMN14774299            |
|                                       | Liver           | Juvenile | Male   | Castrated               | 125 bp PE    | —                       |
|                                       | Liver           | Juvenile | Male   | Control                 | 125 bp PE    | SAMN14774321            |
|                                       | Liver           | Juvenile | Female | Testosterone            | 125 bp PE    |                         |
|                                       | Liver           | Juvenile | Male   | Testosterone            | 125 bp PE    |                         |
| <b>4. Simpson<br/>et al. In Prep.</b> | Liver           | Adult    | Male   | Control Lab             | 150 bp PE    | SAMN08687228            |
|                                       | Liver           | Adult    | Male   | Acute Heat Stress       | 150 bp PE    | —                       |
|                                       | Liver           | Adult    | Male   | Fire Ant Bitten         | 150 bp PE    | SAMN08687245            |

894  
 895 McGaugh SE, Bronikowski AM, Kuo C-H, Reding DM, Addis EA, Fligel LE, et al. Data from: Rapid molecular evolution across  
 896 amniotes of the IIS/TOR network. Dryad Digital Repository. <http://dx.doi.org/10.5061/dryad.vn872.2015>.  
 897 Cox, C. L., A. K. Chung, D. C. Card, T. A. Castoe, N. Pollock, H. John-Alder, and R. M. Cox. Evolutionary regulation of sex-biased  
 898 gene expression and sexual dimorphism.  
 899 Simpson, D., R. Telemeco, T. Langkilde, T. S. Schwartz. Different ecological stressors have contrasting transcriptomic  
 900 responses.



901 **Table 6.** Comparison of type of genome assembly as a reference for population-level analyses for RNAseq and Whole Genome Sequencing  
 902 of individual from Alabama (AL, either low or high coverage), Tennessee (TN) and Arkansas (AR). Datasets were mapped to either the  
 903 Supernova Assembly containing only the 10X Genomics data, the HiRise Assembly, or the PBjelly assembly (SceUnd1.0). Average  
 904 SAMTOOLS QC-passed reads, reads mapped, and percentage of mapped QC-passed reads for every sequencing depth and population.  
 905 Average whole-genome coverage and theoretical HET SNP sensitivity for every sequencing depth and population.  
 906  
 907

|                  |                            | <b>RNAseq-AL</b> | <b>Low Cov-AL</b> | <b>High Cov-AL</b> | <b>High Cov-TN</b> | <b>High Cov-AR</b> |
|------------------|----------------------------|------------------|-------------------|--------------------|--------------------|--------------------|
| <b>PBJelly</b>   | <b>QC-passed Reads</b>     | 3.29E7 ± 6.84E6  | 5.09E7 ± 3.35E7   | 3.31E8 ± 2.64E7    | 3.45E8 ± 9.29E7    | 3.31E8 ± 6.09E7    |
|                  | <b>Reads Mapped</b>        | 2.71E7 ± 6.25E6  | 5.06E7 ± 3.33E7   | 3.29E8 ± 2.63E7    | 3.41E8 ± 9.05E7    | 3.22E8 ± 6.66E7    |
|                  | <b>% Reads Mapped</b>      | 82.28 ± 0.09     | 99.46 ± 0.11      | 99.47 ± 0.08       | 98.97 ± 0.61       | 97.00 ± 4.78       |
|                  | <b>Whole-genome (X)</b>    | NA               | 3.36 ± 2.97       | 21.75 ± 11.46      | 22.04 ± 12.14      | 21.04 ± 11.64      |
|                  | <b>HET SNP sensitivity</b> | NA               | 0.55              | 0.88               | 0.87               | 0.86               |
| <b>HiRise</b>    | <b>QC-passed Reads</b>     | 3.30E7 ± 6.86E6  | 5.11E7 ± 3.36E7   | 3.33E8 ± 2.66E7    | 3.47E8 ± 9.39E7    | 3.33E8 ± 6.14E7    |
|                  | <b>Reads Mapped</b>        | 2.71E7 ± 6.30E6  | 5.07E7 ± 3.34E7   | 3.30E8 ± 2.65E7    | 3.43E8 ± 9.13E7    | 3.23E8 ± 6.69E7    |
|                  | <b>% Reads Mapped</b>      | 82.37 ± 0.09     | 99.29 ± 0.11      | 99.29 ± 0.08       | 98.80 ± 0.60       | 96.84 ± 4.75       |
|                  | <b>Whole genome (X)</b>    | NA               | 3.56 ± 2.95       | 23.02 ± 10.52      | 23.33 ± 11.25      | 22.27 ± 10.81      |
|                  | <b>HET SNP sensitivity</b> | NA               | 0.58              | 0.93               | 0.91               | 0.91               |
| <b>SuperNova</b> | <b>QC-passed Reads</b>     | 3.28E7 ± 6.83E6  | 5.11E7 ± 3.36E7   | 3.33E8 ± 2.66E7    | 3.47E8 ± 9.39E7    | 3.33E8 ± 6.14E7    |
|                  | <b>Reads Mapped</b>        | 2.68E7 ± 6.19E6  | 5.07E7 ± 3.34E7   | 3.30E8 ± 2.65E7    | 3.43E8 ± 9.13E7    | 3.23E8 ± 6.69E7    |
|                  | <b>% Reads Mapped</b>      | 81.49 ± 0.09     | 99.29 ± 0.11      | 99.29 ± 0.08       | 98.80 ± 0.60       | 96.84 ± 4.75       |
|                  | <b>Whole-genome (X)</b>    | NA               | 3.56 ± 2.95       | 23.02 ± 10.52      | 23.33 ± 11.25      | 22.27 ± 10.81      |
|                  | <b>HET SNP sensitivity</b> | NA               | 0.58              | 0.93               | 0.91               | 0.91               |

908 **Table 7.** *Sceloporus* species with partial genomic sequence assemblies. Genomic resources for 34 of the species were obtained using  
 909 reduced representation libraries (Arthofer et al. 2014), while one species, *S. occidentalis*, was sequenced using whole genome shotgun  
 910 sequencing (Leaché et al. 2013). The data were downloaded from the Sequence Read Archive (Study Accession SRP041983; Genomic  
 911 Resources Development Consortium et al., 2015).

| Species                 | SRA<br>Accession | Original De Novo Assembly |           |                |                | Reference-based Assembly |           |                |                |
|-------------------------|------------------|---------------------------|-----------|----------------|----------------|--------------------------|-----------|----------------|----------------|
|                         |                  | Gigabases                 | %Coverage | BUSCO<br>%Comp | BUSCO<br>%Frag | %MAPPED                  | %Coverage | BUSCO<br>%Comp | BUSCO<br>%Frag |
| <i>S. occidentalis</i>  | SRX545583        | 40.88                     | 61.01     | 16.2           | 32.8           | 96.59                    | 88.68     | 90.2           | 5.7            |
| <i>S. adleri</i>        | SRX542351        | 6.14                      | 0.88      | 0              | 0              | 94.18                    | 63.2      | 25.8           | 23.3           |
| <i>S. angustus</i>      | SRX542352        | 5.9                       | 1.18      | 0.1            | 1.1            | 74.73                    | 46.43     | 33.0           | 27.7           |
| <i>S. bicanthalis</i>   | SRX542353        | 5.1                       | 1.74      | 0.2            | 1.6            | 92.52                    | 42.26     | 7.0            | 19.5           |
| <i>S. carinatus</i>     | SRX542354        | 7.96                      | 1.38      | 0.2            | 1.2            | 75.11                    | 46.47     | 31.7           | 31.1           |
| <i>S. clarkii</i>       | SRX542380        | 3.92                      | 0.08      | 0.0            | 0.0            | 86.84                    | 15.71     | 0.8            | 3.0            |
| <i>S. cowlesi</i>       | SRX542355        | 4.93                      | 3.78      | 0.2            | 3.1            | 97.88                    | 60.17     | 13.7           | 21.6           |
| <i>S. edwardtaylori</i> | SRX542356        | 4.57                      | 1.37      | 0.1            | 1.4            | 95.94                    | 58.21     | 13.8           | 20.8           |
| <i>S. exsul</i>         | SRX542357        | 3.57                      | 0.04      | 1.7            | 0.3            | 80.2                     | 52.16     | 6.0            | 16.3           |
| <i>S. formosus</i>      | SRX542358        | 6.5                       | 1.81      | 0.1            | 1.7            | 96.19                    | 70.49     | 39.1           | 27.1           |
| <i>S. gadoviae</i>      | SRX542359        | 5.82                      | 1.06      | 0.2            | 0.9            | 87.34                    | 40.13     | 4.4            | 14.8           |
| <i>S. graciosus</i>     | SRX542383        | 4.53                      | NA        | 0.1            | 0.4            | 84.72                    | 7.13      | 0.1            | 0.4            |
| <i>S. grammicus</i>     | SRX542360        | 4.76                      | 1.81      | 0.1            | 1.7            | 92.92                    | 52.8      | 12.2           | 20.7           |
| <i>S. horridus</i>      | SRX542361        | 3.74                      | 0.17      | 0.2            | 0.9            | 95.92                    | 37.49     | 1.6            | 7.0            |
| <i>S. hunsakeri</i>     | SRX542362        | 4.42                      | 1.14      | 1.8            | 0.9            | 83.3                     | 38.41     | 2.8            | 10.6           |
| <i>S. jalapae</i>       | SRX542363        | 6.96                      | 1.5       | 0.0            | 0.0            | 88.12                    | 56.49     | 34.4           | 31.0           |
| <i>S. licki</i>         | SRX542364        | 3.38                      | 0.95      | 1.4            | 1.0            | 93.31                    | 36.81     | 2.1            | 9.1            |
| <i>S. magister</i>      | SRX542365        | 3.5                       | 0.8       | 1.7            | 0.7            | 84.26                    | 31.74     | 1.2            | 5.6            |
| <i>S. malachiticus</i>  | SRX542384        | 4.55                      | 0.11      | 0.1            | 0.4            | 91.15                    | 22.27     | 0.9            | 4.2            |

|                                                    |           |      |      |     |     |       |       |       |       |
|----------------------------------------------------|-----------|------|------|-----|-----|-------|-------|-------|-------|
| <b>S. mucronatus</b>                               | SRX542366 | 5.54 | 1.25 | 0.2 | 1.4 | 94.23 | 60.02 | 20.9  | 25.3  |
| <b>S. ochoterenae</b>                              | SRX542367 | 6.63 | 1.57 | 0.3 | 2.5 | 78.84 | 46.78 | 17.6  | 21.6  |
| <b>S. olivaceus</b>                                | SRX542368 | 3.14 | 1.11 | 1.2 | 0.9 | 95.38 | 35.89 | 1.4   | 8.2   |
| <b>S. orcutti</b>                                  | SRX542369 | 3.88 | 0.99 | 1.8 | 0.9 | 81.14 | 35.79 | 1.9   | 8.8   |
| <b>S. palaciosi</b>                                | SRX542370 | 6.59 | 1.58 | 0.1 | 1.5 | 90.49 | 42.11 | 3.4   | 11.3  |
| <b>S. scalaris</b>                                 | SRX542371 | 6.56 | 1.04 | 0.2 | 1.8 | 89.93 | 65.53 | 47.0  | 24.9  |
| <b>S. smithi</b>                                   | SRX542373 | 4.75 | 1.18 | 0.1 | 0.8 | 77.35 | 39.47 | 7.7   | 16.8  |
| <b>S. spinosus</b>                                 | SRX542374 | 5.91 | 1.51 | 0.1 | 1.1 | 96.8  | 69.15 | 36.0  | 26.9  |
| <b>S. taeniocnemis</b>                             | SRX542382 | 3.68 | 0.14 | 0.1 | 0.4 | 88.58 | 22.35 | 0.9   | 3.7   |
| <b>S. torquatus</b>                                | SRX542375 | 6.78 | 1.75 | 0.3 | 2.2 | 90.15 | 57.36 | 20.1  | 21.4  |
| <b>S. tristichus</b>                               | SRX542376 | 5.36 | 4.67 | 0.3 | 3.4 | 98.29 | 62.09 | 17.4  | 22.8  |
| <b>S. utiformis</b>                                | SRX542381 | 4.13 | 0.06 | 0.0 | 0.3 | 63.97 | 17.42 | 1.1   | 3.7   |
| <b>S. variabilis</b>                               | SRX542377 | 7.59 | 1.5  | 0.2 | 1.2 | 76.93 | 52.22 | 38.8  | 30.2  |
| <b>S. woodi</b>                                    | SRX542378 | 3.52 | 0.7  | 1.7 | 0.8 | 94.64 | 52.36 | 6.4   | 17.9  |
| <b>S. zosteromus</b>                               | SRX542379 | 2.71 | 0.62 | 1.3 | 0.9 | 93.48 | 29.39 | 0.7   | 5.3   |
| <b>Average<br/>(excluding S.<br/>occidentalis)</b> |           |      |      |     |     |       |       |       |       |
|                                                    |           |      |      |     |     |       |       | 1.23% | 44.4% |

912

913

914

915

916

917

918

Genomic Resources Development Consortium, Arthofer W., Banbury B.L., Carneiro M., Cicconardi F., Duda T.F., Harris R.B., Kang D.S., Leaché A.D., Nolte V., Nourisson C., Palmieri N., Schlick-Steiner B.C., Schlötterer C., Sequeira F., Sim C., Steiner F.M., Vallinoto M., Weese D.A. 2014. Genomic resources notes accepted 1 August 2014–30 September 2014. *Molecular Ecology Resources*. 15:228–229.

Leaché, A.D., Harris, R.B., Maliska, M.E. and Linkem, C.W., 2013. Comparative species divergence across eight triplets of spiny lizards (*Sceloporus*) using genomic sequence data. *Genome Biology and Evolution*. 5:2410–2419.

919

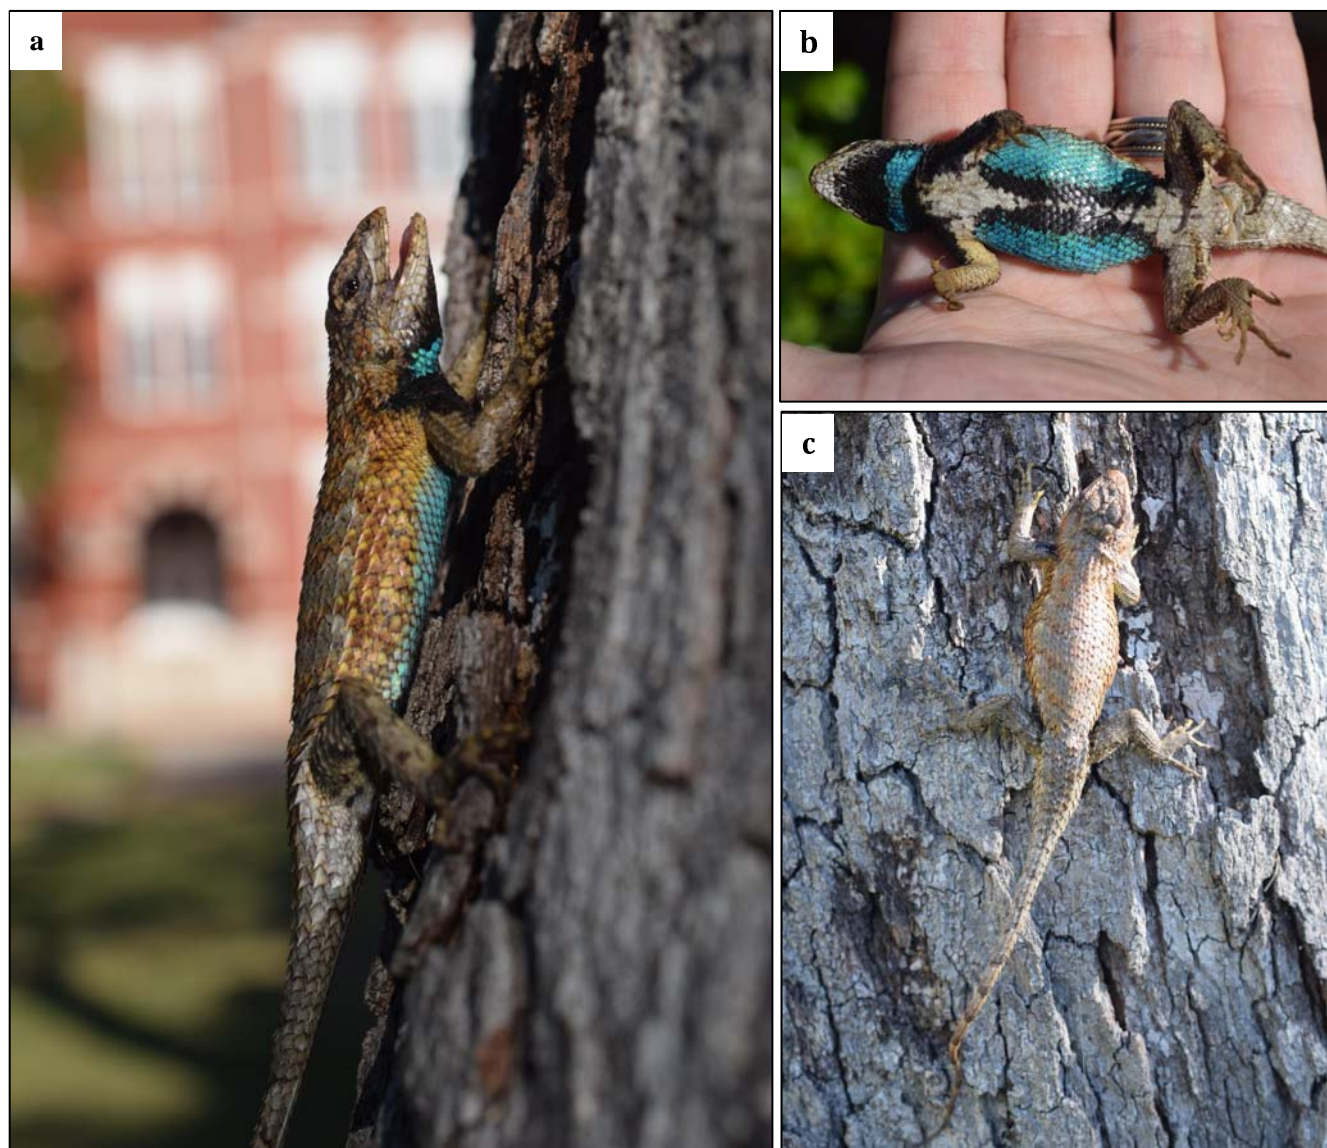

951  
952 **Figure 1.** Adult male *Sceloporus undulatus* (Eastern Fence Lizard) from Andalusia, Alabama,  
953 pictured outside of Sanford Hall at Auburn University, (a) profile, (b) ventral, (c) dorsal view.  
954 This specimen was used for genome sequencing at DoveTail Genomics. Photo credits to R.  
955 Telemeco.

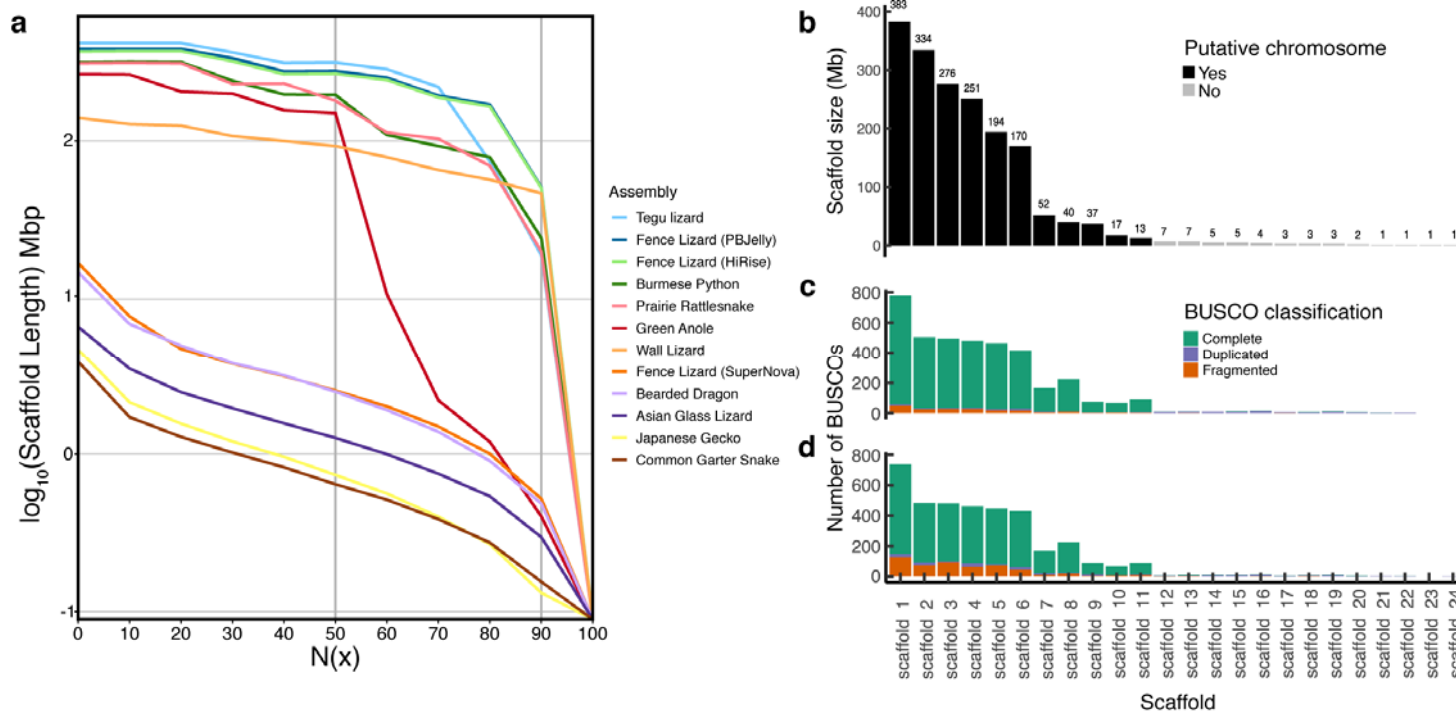

956  
 957 **Figure 2.** An evaluation of *S. undulatus* genome assembly quality. (a) Comparison of the contiguity of the three *S. undulatus* genome  
 958 assemblies (Fence Lizard) relative to other squamates genome assemblies based on the log 10 of the scaffold length. The X axis is the  
 959 N(x) with the N50 and the N90 emphasized with a vertical line, representing the scaffold size that contains 50 or 90 percent of the  
 960 data. The legend lists the assemblies in the order of the lines from most contiguous (top) to least contiguous (bottom). Note the Fence  
 961 Lizard PBJelly (dark blue, SceUnd1.0) and Fence Lizard HiRise (green) assemblies are the second and third from the top and are  
 962 nearly indistinguishable. (b-d) Scaffold size distribution of SceUnd1.0 and the number of BUSCO genes that mapped to each scaffold.  
 963 (b) The length of the first 24 scaffolds, where the first 11 scaffolds likely represent the haploid N=11 chromosomes (6  
 964 macrochromosomes and 5 microchromosomes). The numbers above each bar represent scaffold length to the nearest Mb. The number  
 965 of BUSCO genes that mapped to each scaffold based on (c) the genome assembly, and (d) the predicted proteins from the annotation.  
 966 The 11 large scaffolds inferred to correspond to chromosomes have many unique and complete BUSCO genes (green), whereas the

967 smaller contigs have many duplicated BUSCOs (purple) suggesting they are the result of reads not mapping correctly to the  
968 chromosomes.

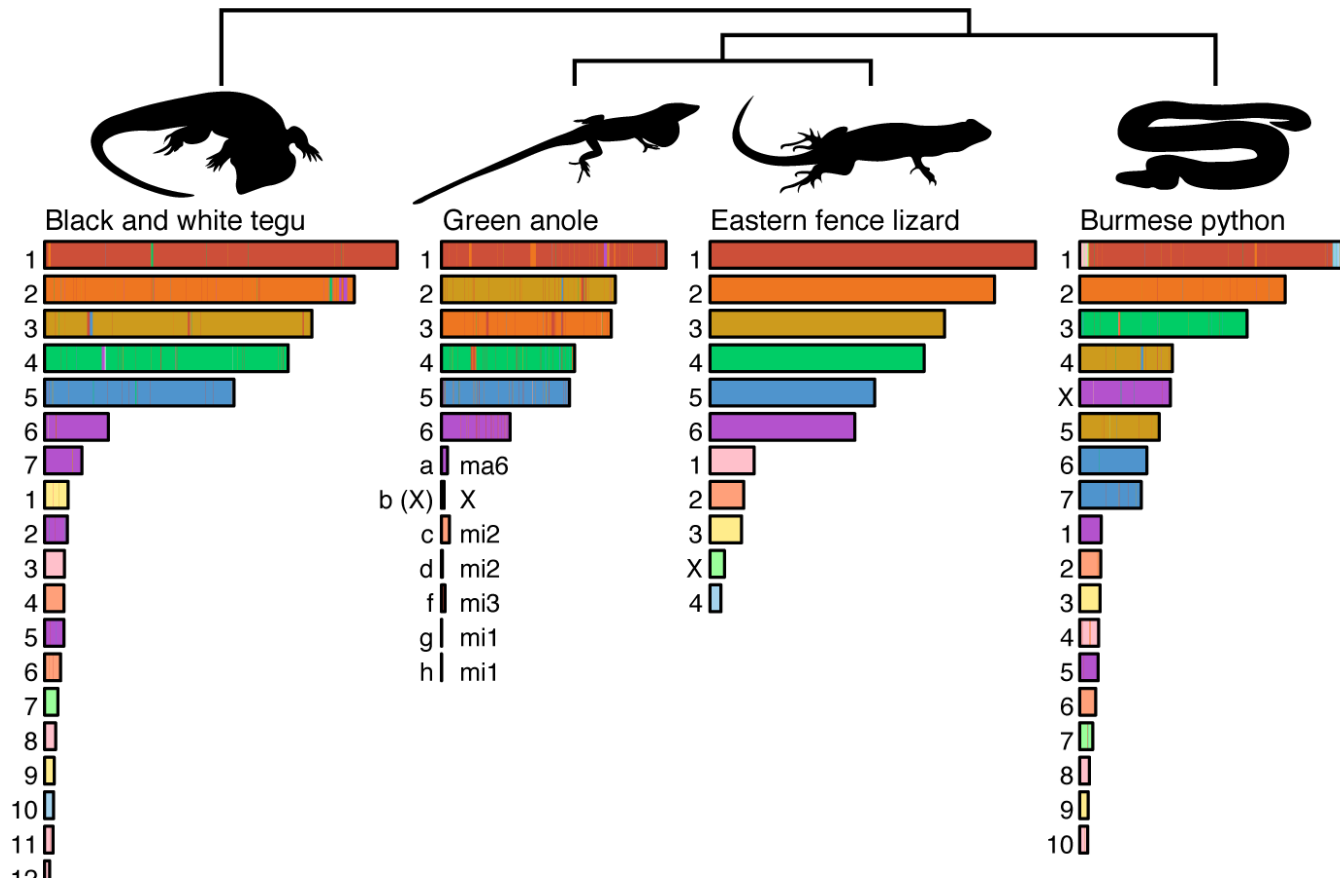

970  
971

972 **Figure 3.** Marker-based synteny painting of fence lizard scaffolds/chromosomes onto the tegu, green anole, and python assemblies,  
973 depicted from left-to-right as tegu, green anole, fence lizard, and python. The color indicates synteny for that scaffold. The linkage  
974 groups representing macrochromosomes and microchromosomes are numbered independently for each species. Green anole linkage  
975 groups are labeled with lowercase letters, and the syntenic fence lizard chromosomes are listed to the right. Sex chromosomes are  
976 indicated with uppercase letters, where known.

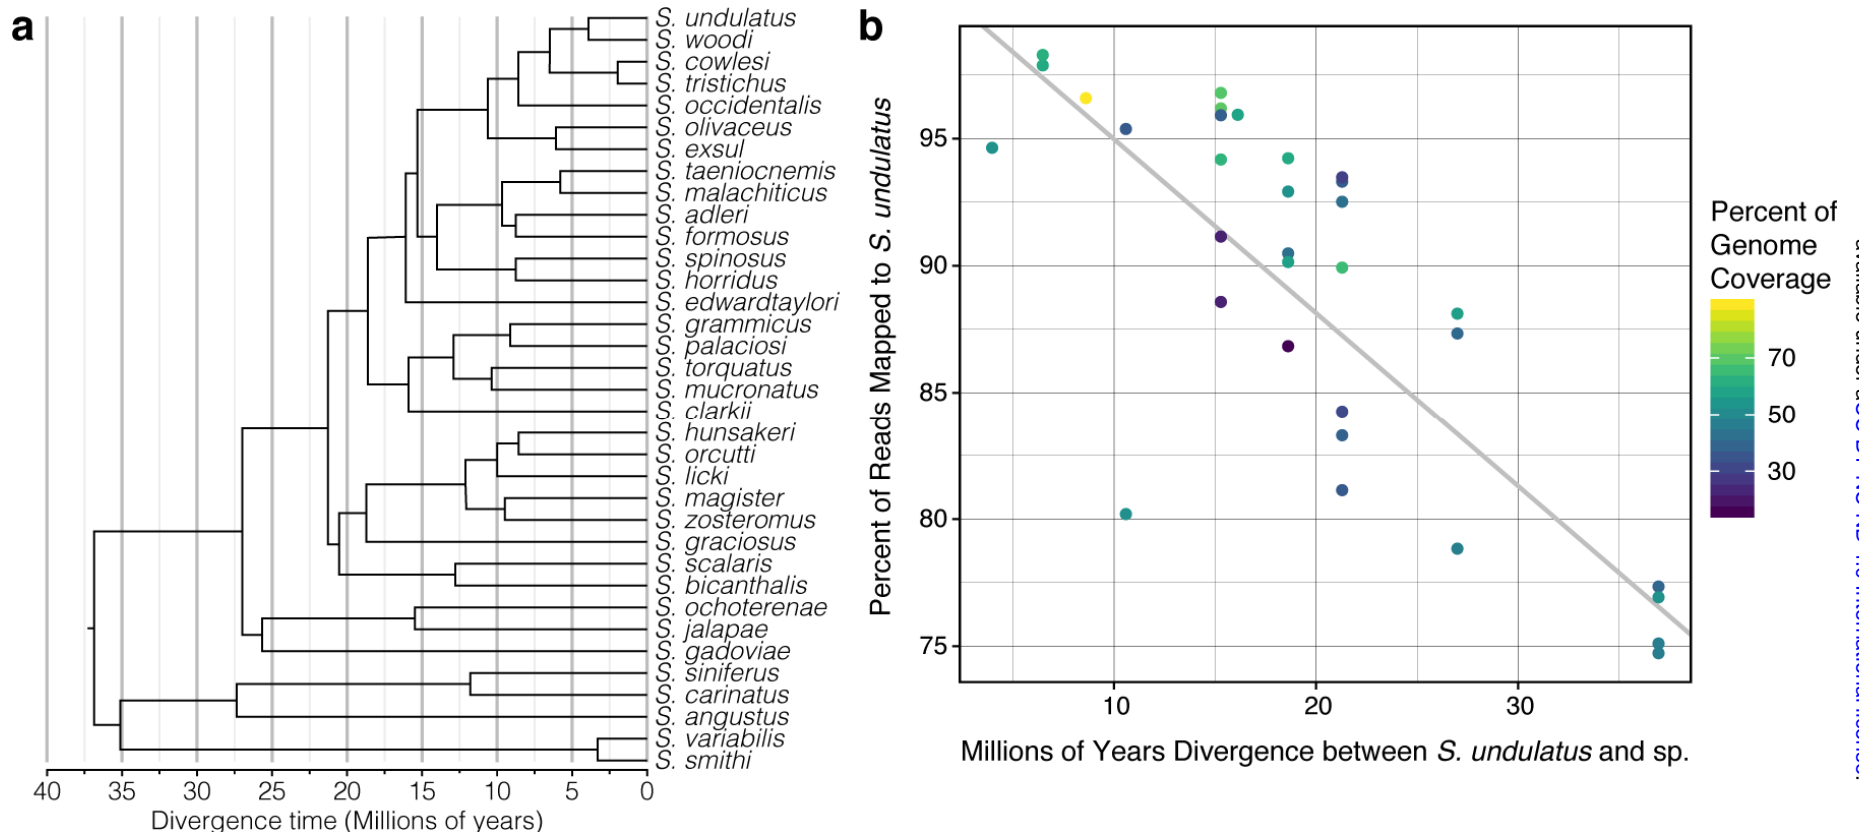

977  
978  
979  
980  
981  
982  
983

**Figure 4.** Relationship between divergence time and effectiveness of using the *Sceloporus undulatus* assembly for reference-based mapping. (a) A phylogenetic tree of *Sceloporus* species with draft genomic data. Species groups' names are included for the groups closest to *S. undulatus*. (b) Mapping each species by % reads mapped and time of divergence from *S. undulatus* with a linear regression. The color of the dots represents the percent of the genome that is covered, which was affected by the number of redundant sequences in the reduced representation library for a particular species.



984 **Supplementary Methods and Results**

985  
986 **A chromosome-level genome assembly for the Eastern Fence Lizard (*Sceloporus***  
987 ***undulatus*), a reptile model for physiological and evolutionary ecology**

988 **Westfall et al.**

989 **Availability of Supporting Data**

- 990 1. All three genome assemblies are provided as supplemental data
- 991 a. SuperNova assembly containing data from 10X Genomics Chromium:  
992 GenomeAssembly\_SuperNova\_Sceloporus\_undulatus\_pseudohap.fasta.gz
- 993 b. HiRise assembly containing the 10X Genomics data with the addition of the Hi-C  
994 data:  
995 GenomeAssembly\_HiRise\_Sceloporus\_undulatus.fasta.gz
- 996 c. PBJelly Assembly (SceUnd1.0) containing the 10X Genomics data, the Hi-C data,  
997 with the addition of PacBio data:  
998 GenomeAssembly\_SceUnd1.0\_PBJELLY.fasta.gz
- 999 2. Tissue-Embryo Transcriptomes and annotation are provided as supplemental files.
- 1000 a. Transcriptome File: TranscriptomeAssembly\_Tissues-Embryo\_Trinity.fasta
- 1001 b. Annotation File: TranscriptomeAssembly\_Tissues-Embryo\_Transdecoder.gff3
- 1002 3. Truncated assembly used for annotation pipeline (SceUnd1.0\_top24)
- 1003 a. SceUnd1.0\_top24.fasta. This file contains only the longest 24 scaffolds and they  
1004 have been renamed 1-24 from longest to shortest.
- 1005 b. Funannotate Folder: contains that annotation files
- 1006 c. SceUnd1.0\_top24\_CompiledAnnotation.csv
- 1007 4. The mitochondrial genomes and the annotation are provided as supplemental files.
- 1008 a. MitoGenomeAssembly\_Sceloporus\_undulatus.fasta
- 1009 b. MitoGenomeAssembly\_Sceloporus\_undulatus\_Annotation.gff
- 1010 5. The reference-based assemblies for the 34 *Sceloporus* species.
- 1011 a. GenomeAssemblies\_34Sceloporus.tar.gz
- 1012 b. Code for generated consensus sequences for each species: mkgenome\_AW-AC.sh
- 1013

1014 **Full list of genes identified in the mitochondrial genome.**

1015 Annotations from the *A. carolinensis* mitochondrial genome (17,223 bp) transferred well to  
1016 the newly assembled *S. undulatus* mitochondrial genome (17,072 bp), with 13 protein  
1017 coding genes (ATP6, ATP8, COX1, COX2, COX3, CYTB, ND1, ND2, ND3, ND4, ND4L, ND5,  
1018 ND6), 22 tRNA regions (tRNA-Phe, tRNA-Val, tRNA-Leu, tRNA-Ile, tRNA-Gln, tRNA-Met,  
1019 tRNA-Trp, tRNA-Ala, tRNA-Asn, tRNA-Cys, tRNA-Tyr, tRNA-Ser, tRNA-Asp, tRNA-Lys, tRNA-  
1020 Gly, tRNA-Arg, tRNA-His, tRNA-Ser, tRNA-Leu, tRNA-Glu, tRNA-Thr, tRNA-Pro), 2 rRNA  
1021 regions (12S, 16S), and a control region.

1022

1023 **Table S1** Contig length statistics for *Sceloporus undulatus de novo* transcriptome  
 1024 assemblies. 4 tissues = 3 tissues (brain, skeletal muscle and embryos) + 1 tissue (liver;  
 1025 McGaugh et al, 2015).

|                          | 1 tissue | 3 tissues | 4 tissues |
|--------------------------|----------|-----------|-----------|
| Minimum length           | 201.0    | 201.0     | 201.0     |
| 1 <sup>st</sup> Quartile | 266.0    | 266.0     | 266.0     |
| Median                   | 382.0    | 377.0     | 375.0     |
| Mean                     | 829.9    | 822.4     | 781.0     |
| 3 <sup>rd</sup> Quartile | 808.0    | 732.0     | 711.0     |
| Maximum length           | 16,776.0 | 30,410.0  | 30,258.0  |

1026

1027

1028

1029 **Table S2** Reads mapped to *Sceloporus undulatus de novo* transcriptome assembly using 4  
 1030 tissues.

| Read classification | Counts      | Percentage of mapped reads |
|---------------------|-------------|----------------------------|
| Proper pairing      | 170,981,981 | 97.10%                     |
| Left read only      | 3,778,790   | 2.15%                      |
| Right read only     | 1,015,874   | 0.58%                      |
| Improper pairing    | 310,142     | 0.18%                      |

1031

1032

1033

1034

1035 **Table S3** Representation of full-length reconstructed protein-coding genes in *Sceloporus*  
 1036 *undulatus de novo* transcriptome, using the protein set of *Anolis carolinensis* (AnoCar2.0,  
 1037 Ensembl) as a reference.

1038

| Alignment coverage | Counts | Cumulative counts |
|--------------------|--------|-------------------|
| 100%               | 9,874  | 9,874             |
| 90%                | 1,349  | 11,223            |
| 80%                | 799    | 12,022            |
| 70%                | 757    | 12,779            |
| 60%                | 725    | 13,504            |
| 50%                | 577    | 14,081            |
| 40%                | 463    | 14,544            |
| 30%                | 455    | 14,999            |
| 20%                | 358    | 15,357            |
| 10%                | 97     | 15,454            |

1039

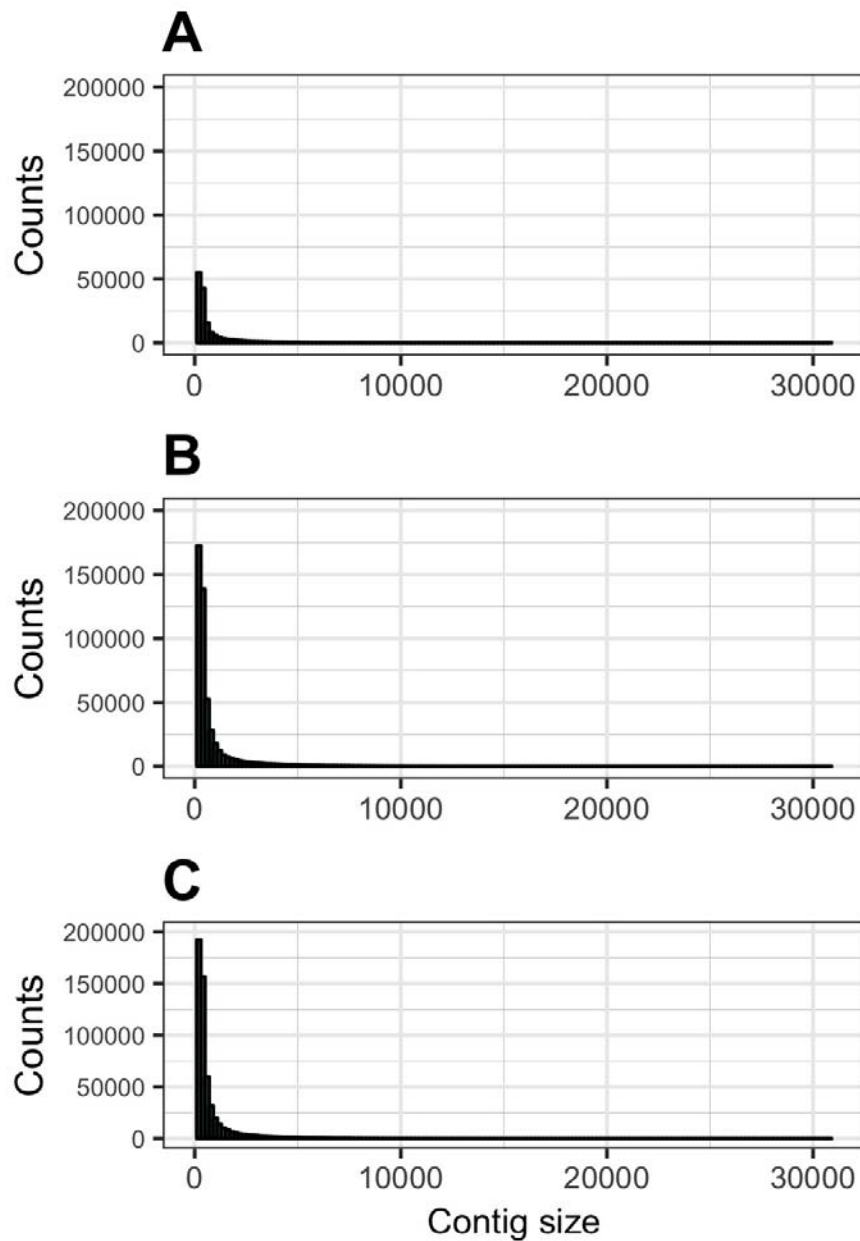

1040  
1041  
1042  
1043  
1044  
1045  
1046

**Figure S1.** Contig sizes for different *Sceloporus undulatus* transcriptome assemblies. Assemblies used **(A)** the previously published single tissue transcriptome (liver [23]), **(B)** transcriptomes from the 3 tissues sequenced in this study (brain, skeletal muscle and embryos), and **(C)** the combined data set of 4 tissues ([23] and this study).
